# Supplementary material for: ANXA1 and ARG2 drive T cell proliferation in ischemia-reperfusion injury: integrated bulk and single-cell transcriptomic analysis
Source: Front Cell Dev Biol. 2025 Sep 4;13:1673163. doi: 10.3389/fcell.2025.1673163 (PMC12443811; doi:10.3389/fcell.2025.1673163)
Supplement: Supplementary file 7 [file Table5.xlsx]

## Sheet: Anxa1
	ID	Description	setSize	enrichmentScore	NES	pvalue	p.adjust	qvalue	rank	leading_edge	core_enrichment
mmu03010	mmu03010	Ribosome	84	0.729089445094303	3.09035749168413	9.924258e-28	3.304778e-25	1.681901e-25	980	tags=87%, list=22%, signal=69%	20091/20088/27367/20102/20042/20085/66475/19933/19946/20005/20104/65019/19989/76846/26451/20116/67427/67891/319195/110954/100503670/20055/19988/19896/20115/11837/27050/269261/19981/68052/66480/267019/54127/67248/20084/67097/19982/78294/56040/27176/20103/114641/270106/68436/67281/22121/16785/67671/20054/19941/26961/19934/67025/27207/27370/19942/19921/19951/66481/19944/19899/76808/20068/57294/14109…
mmu05171	mmu05171	Coronavirus disease - COVID-19	200	0.501943203208898	2.34100170622887	2.635090e-17	1.754970e-15	8.931569e-16	902	tags=52%, list=20%, signal=44%	74145/21898/12273/20091/20088/27367/20102/20042/20085/66475/19933/19946/20005/20104/20848/65019/19989/76846/26451/20116/67427/67891/319195/110954/100503670/20055/19988/19896/20115/20296/11837/27050/269261/19981/110135/68052/18033/66480/267019/54127/67248/20084/21937/67097/19982/78294/170744/56040/12274/27176/20103/114641/270106/17874/68436/99571/67281/22121/216799/16785/67671/20054/19941/26961/19…
mmu04110	mmu04110	Cell cycle	132	0.501466137761264	2.25222956633099	2.726486e-12	1.297028e-10	6.600967e-11	1348	tags=59%, list=30%, signal=43%	268697/12428/18817/12236/12235/12534/12532/22629/105988/22137/27214/12442/56150/18538/67141/268930/107995/12447/12581/22630/12531/17126/56452/17215/17217/26931/12545/12580/71890/23834/21809/21803/12579/18392/19053/12544/66156/12237/50883/17218/12566/52206/56371/13555/17220/55948/12649/13557/56317/54401/17219/104394/12448/21781/68999/12567/22059/17216/22628/13006/17128/21808/56438/51792/12575/2406…
mmu03030	mmu03030	DNA replication	35	0.589474836261138	2.14944301195567	3.634867e-06	3.782534e-05	1.925045e-05	1377	tags=80%, list=31%, signal=56%	18538/19076/69263/17215/17217/16881/18969/106344/19891/17218/69745/69724/17220/17219/67967/59001/18973/72151/18968/18971/17216/19075/18974/19819/67153/68240/19687/18972
mmu04613	mmu04613	Neutrophil extracellular trap formation	82	0.464856897343958	1.96473026405917	5.558359e-06	5.608889e-05	2.854532e-05	1831	tags=72%, list=41%, signal=43%	21898/16409/12273/14293/16416/14289/12363/19353/110135/18033/170744/17969/99571/17970/170743/14161/20344/24088/12266/15289/15078/19094/20779/14129/16414/17972/12946/11651/26417/11739/23797/19354/26415/74244/20963/20345/26395/22334/12362/18798/433759/18707/18803/11461/18708/19697/22371/22335/234779/15081/29857/13058/246256/11465/50701/18751/15182/16408/18797
mmu03040	mmu03040	Spliceosome	118	0.442411619370934	1.96260107229999	3.832346e-07	6.077005e-06	3.092770e-06	2066	tags=72%, list=46%, signal=40%	15387/76522/72654/76938/230596/20639/68011/21681/15382/66585/20643/66373/20638/66441/67678/75062/56070/20641/68183/17149/53817/101943/74351/78651/66101/68988/53317/20227/56031/20630/66094/229279/76936/60365/107686/68981/20383/66642/192170/27756/66810/20624/20222/68479/57905/70052/193116/68816/67439/20637/66877/15381/70767/319322/13204/217207/71702/28000/66492/66125/108014/107701/67039/225160/6887…
mmu05150	mmu05150	Staphylococcus aureus infection	41	0.521926128408912	1.96152921152528	6.955120e-05	4.541284e-04	2.311196e-04	828	tags=46%, list=18%, signal=38%	16409/16668/12273/14293/12628/14289/99571/15894/20344/12267/12266/50908/12630/14129/17174/16414/12259/12262/12260
mmu04530	mmu04530	Tight junction	128	0.434659511169166	1.94655897283584	1.959151e-07	3.624429e-06	1.844581e-06	1512	tags=57%, list=34%, signal=39%	16456/67771/22142/56378/53624/11867/76709/12540/16412/19353/12739/68328/18538/71908/12737/11848/22143/109711/67374/67268/13043/98932/22323/17698/17904/19053/12394/70737/56449/93737/19878/67938/108097/105787/20779/12638/18417/26401/54419/17999/19079/15163/17906/18759/21873/12479/21872/17886/12740/71978/56443/22376/12567/68089/16897/75723/51792/73699/56173/22146/114141/269643/21844/83814/19082/5243…
mmu04670	mmu04670	Leukocyte transendothelial migration	106	0.432917201203791	1.89689674136866	3.431333e-06	3.685915e-05	1.875873e-05	1801	tags=65%, list=40%, signal=40%	16456/16409/53624/12540/16412/19353/12739/71908/12737/11848/109711/67374/67268/98932/17395/22323/17698/215449/17969/18613/14679/15894/17970/12385/19878/14678/67938/19094/16414/17972/18417/54419/17390/22324/17906/22329/21838/12740/19354/26415/14083/56173/57257/20469/114141/18707/18803/22330/11461/54354/60363/60595/12388/18708/19247/22165/234779/22350/22325/56508/29857/19303/13058/83964/11465/12927…
mmu04114	mmu04114	Oocyte meiosis	107	0.431629387276642	1.89188499740778	6.458823e-06	6.325847e-05	3.219413e-05	1187	tags=49%, list=26%, signal=37%	12314/268697/18817/12235/12534/12532/22629/70405/105988/108058/20878/12442/56150/12313/67141/268930/107995/12323/12447/22630/26931/16440/71890/19053/66156/19058/12566/52206/19094/50878/11514/56317/54401/19047/12448/26417/110651/68999/18667/26415/22628/13006/20111/56438/210044/11513/104111/26395/51792/24061/73699/17120
mmu05133	mmu05133	Pertussis	66	0.460929657924829	1.88328653074393	8.907674e-05	5.596709e-04	2.848333e-04	1500	tags=58%, list=33%, signal=39%	12314/21898/16409/70405/16412/12313/11848/12475/20311/18033/12631/17874/216799/66824/16402/14679/14678/12266/50908/12258/19094/16414/12259/12262/12260/117149/26417/12367/26415/17087/266632/12362/83430/12269/12369/12315/21926/19697
mmu05132	mmu05132	Salmonella infection	168	0.407925709093952	1.87762750895845	2.904816e-07	4.836518e-06	2.461449e-06	1460	tags=52%, list=33%, signal=36%	67771/21898/22142/56378/73710/11867/76709/18481/12363/12540/67665/11796/11797/19353/13427/21899/56532/22152/20130/11848/12475/22154/69654/22143/27050/67268/98932/18033/21937/11845/192176/17874/216799/66824/22151/19878/22153/24088/53791/18643/234663/67938/21414/19094/68652/67951/12028/16150/30955/21933/20430/11651/17906/117149/26417/18479/101314/22428/23797/12370/12367/56443/68089/26415/192656/225…
mmu05203	mmu05203	Viral carcinogenesis	140	0.415063343639972	1.87661748299067	1.169409e-06	1.647182e-05	8.383005e-06	1893	tags=62%, list=42%, signal=37%	12428/12534/22629/18176/12540/20848/19353/15387/11848/107995/109711/12447/22630/18033/14784/17096/12579/19664/20259/12266/12566/20779/12649/12028/54401/18034/12448/26417/78284/227753/16653/12913/12370/12367/12567/22059/237336/20963/235459/16453/22628/22030/17164/12774/12575/231991/242341/13194/19650/17120/18746/22627/12578/433759/16451/14964/15013/27401/74197/12427/18707/15007/18035/16391/18970/6…
mmu04820	mmu04820	Cytoskeleton in muscle cells	125	0.418401599094872	1.86962694066743	3.381901e-06	3.685915e-05	1.875873e-05	1155	tags=48%, list=26%, signal=37%	326618/12834/12833/16416/13511/16412/22003/20969/12842/16398/24051/12825/12843/59069/13003/12832/11717/12826/98932/22004/12827/68794/109620/21956/11933/104099/14268/12831/21826/16400/13179/16410/16402/21827/192897/13346/232975/11468/16773/12835/16403/13807/109700/53867/17906/12814/17886/13405/22793/16480/13506/67451/11932/27222/21825/94216/16905/319480/24052/11603
mmu04666	mmu04666	Fc gamma R-mediated phagocytosis	84	0.440797052725128	1.86838594820857	2.638160e-05	1.996607e-04	1.016133e-04	1578	tags=58%, list=35%, signal=39%	67771/56378/11867/76709/12540/19353/18783/13196/22323/17357/16331/12631/11845/17969/14389/17096/18720/20259/14129/20698/17118/11651/22324/242687/26417/18479/227753/18806/23797/56443/19354/22376/68089/20963/16885/26395/16886/218038/13430/57257/18753/15162/18707/18803/83767/18708/234779/17909/22325
mmu05134	mmu05134	Legionellosis	36	0.507660149330671	1.86039959199709	4.317353e-04	1.942809e-03	9.887537e-04	1625	tags=75%, list=36%, signal=48%	21898/16409/11783/12475/330122/18033/17874/66824/24088/53791/12266/16414/12946/18034/12370/12367/20310/20333/12362/11840/17948/12369/18035/21926/19697/14825/16193
mmu05205	mmu05205	Proteoglycans in cancer	179	0.399618169429679	1.84806861382606	1.187159e-06	1.647182e-05	8.383005e-06	1826	tags=59%, list=41%, signal=36%	21898/18176/108058/16416/12540/16412/20104/20848/20969/19353/12842/16398/20130/11848/12323/12843/66922/22421/13043/12391/17126/17395/17698/192176/14784/14268/16440/216795/29875/21803/22417/13179/16410/14365/16402/12505/19878/24088/14368/19094/20779/12390/19047/18793/17390/11651/15163/22324/93735/26417/18479/15234/13039/57265/16653/23797/12367/15442/22059/22409/26415/22410/21825/14173/22413/22420/…
mmu05166	mmu05166	Human T-cell leukemia virus 1 infection	195	0.395723537763048	1.84274988073646	1.541223e-07	3.018985e-06	1.536452e-06	1517	tags=48%, list=34%, signal=33%	12428/12236/105988/18176/12442/16177/56150/16178/107995/12447/17126/18033/21937/13714/12580/21809/21803/12579/15894/21812/66156/12237/50883/19058/12566/52206/13555/17393/73181/12649/11514/13557/20375/56317/16414/21813/12028/16150/23871/26401/18034/11651/19698/12448/26417/78284/12257/68999/11739/16653/12913/23797/12567/20525/22059/110196/237336/12048/16453/21939/17128/21808/210044/11513/104111/263…
mmu04218	mmu04218	Cellular senescence	130	0.408561888148587	1.83168918956101	6.854763e-06	6.521818e-05	3.319149e-05	1517	tags=52%, list=34%, signal=35%	12314/268697/12428/12534/70405/18176/12442/12334/12313/20130/66922/13685/12447/17126/18033/18787/16440/21809/21803/12579/21812/50883/19058/12566/19094/13555/73181/12649/13557/21813/19047/23871/104394/11651/12448/26417/12333/11739/16653/23797/12567/22059/26415/17535/21808/26395/17164/22334/12575/17127/19650/18018/242705/12578/14964/15013/12427/18707/15007/12315/12530/19744/54354/19360/18708/19697/…
mmu05144	mmu05144	Malaria	41	0.485640772340046	1.82515974848144	5.646932e-04	2.474248e-03	1.259219e-03	1068	tags=51%, list=24%, signal=39%	21898/20969/20296/18613/17874/21809/21826/21803/21827/12985/15894/20344/24088/16971/16414/12946/22329/15234/21825/21939/21808
mmu04625	mmu04625	C-type lectin receptor signaling pathway	87	0.422830435344407	1.80132300302219	1.614364e-04	9.774239e-04	4.974403e-04	1625	tags=55%, list=36%, signal=36%	12314/70405/18176/12313/20130/11848/66922/18033/16440/216799/66824/19058/332579/19094/20779/73181/14127/16150/18034/11651/208650/19698/26417/18479/16653/23797/12370/26415/20963/56489/17164/20295/12362/18018/83430/18753/12042/18707/18035/16391/12315/21926/18708/19697/19247/234779/29857/16193
mmu04062	mmu04062	Chemokine signaling pathway	175	0.388915604484446	1.79464696901585	2.570178e-06	3.056676e-05	1.555634e-05	1578	tags=50%, list=35%, signal=34%	12768/56744/18176/12540/20308/20848/19353/20305/20416/20306/11848/14710/14702/20296/14773/56221/12765/330122/14688/20311/18033/215449/20297/14784/17969/17096/14693/14679/19878/14696/14678/66066/216148/20779/11514/16150/30955/170758/11651/22324/66102/26417/216869/14191/18479/320207/16653/23797/19354/22376/271849/20310/26385/16453/14083/210044/11513/20312/57266/104111/26395/140580/12774/20295/20293…
mmu05135	mmu05135	Yersinia infection	120	0.402016611356795	1.78730210436537	3.410387e-05	2.469141e-04	1.256620e-04	2195	tags=72%, list=49%, signal=38%	67771/21898/56378/11867/76709/12540/16412/19353/11848/20296/18033/11845/14268/17874/216799/66824/16402/18720/19878/54483/19094/20779/68652/16150/170758/11651/22324/242687/26417/110651/23797/56443/19354/22376/68089/26415/16822/16885/22030/20111/14083/26395/140580/266632/12362/18018/56480/20293/16801/57257/18707/18803/26431/18035/11461/21926/26398/18708/19697/22325/29857/16193/19303/11465/12927/201…
mmu05161	mmu05161	Hepatitis B	144	0.391849985298654	1.77618259972592	1.498386e-05	1.216982e-04	6.193587e-05	1775	tags=56%, list=40%, signal=35%	11799/12428/21898/18176/20848/18538/11783/12447/22630/17395/18033/14784/17874/21809/21803/21812/24088/12566/19094/20779/68652/13555/73181/13557/21813/12028/54401/16150/26401/11651/12448/117149/26417/142980/78284/15975/16653/12913/23797/12370/12367/22059/26415/16453/17128/21808/56489/26395/12575/231991/17127/266632/13194/18018/56480/242705/16451/12427/14102/18707/18035/21926/16452/26398/18708/1969…
mmu05167	mmu05167	Kaposi sarcoma-associated herpesvirus infection	167	0.385205783484675	1.77138385245399	1.097908e-05	9.444544e-05	4.806612e-05	1808	tags=57%, list=40%, signal=35%	15979/12314/12768/70405/18176/20848/19353/12313/14710/14702/330122/14688/18033/21937/78294/16440/17096/14693/15894/14696/19058/12266/21414/66066/19094/20779/13555/73181/13557/15976/12028/16150/30955/11651/26417/142980/15975/320207/16653/23797/12370/12367/12567/20310/22059/26415/20963/225326/14173/22030/56489/26395/17164/12774/12575/18018/56480/21415/242705/12981/16451/14964/15013/15162/14102/1470…
mmu04064	mmu04064	NF-kappa B signaling pathway	92	0.411395528869695	1.76618820901803	1.655380e-04	9.843596e-04	5.009701e-04	1930	tags=61%, list=43%, signal=35%	21898/11796/11797/16177/16803/12475/330122/18033/21937/22196/245527/24099/17874/17096/13607/15894/68652/12229/13000/16150/18034/19698/22329/117149/20310/20963/12048/21939/22030/17087/17060/266632/50930/18829/12042/18803/18035/21934/21926/19697/22029/234779/21929/14825/17000/225471/22031/18751/71609/11798/18792/16151/19766/13197/19225/66513
mmu03410	mmu03410	Base excision repair	37	0.476021471043175	1.75568059346444	2.608180e-03	8.685240e-03	4.420179e-03	1788	tags=73%, list=40%, signal=44%	234258/18538/69263/16881/11546/11792/106344/69745/15289/70603/22256/67967/59001/21665/18973/72151/18971/18974/235587/19687/18972/18970/18294/14156/328417/71726/22594
mmu04371	mmu04371	Apelin signaling pathway	118	0.39570352828157	1.7553973153385	7.101871e-05	4.547929e-04	2.314577e-04	1468	tags=49%, list=33%, signal=34%	12314/70405/18176/20750/20104/12313/20130/14710/14702/18791/66922/11475/14688/17126/18787/16440/14693/14679/18181/21812/14696/14678/66066/108097/105787/20698/11514/30955/11651/19079/17906/26417/320207/228785/16653/18576/23797/18131/12550/225326/17128/210044/11513/104111/26395/107589/17127/110891/18798/14674/18127/14709/19082/14697/12315/17897/14707/64337
mmu03430	mmu03430	Mismatch repair	22	0.535616907639702	1.75100605360979	3.400504e-03	1.078445e-02	5.488532e-03	1377	tags=68%, list=31%, signal=48%	18538/26909/69263/16881/106344/19891/69745/17685/18861/67967/72151/18971/68240/19687/18972
mmu05417	mmu05417	Lipid and atherosclerosis	177	0.378629828051757	1.74940944141457	1.192947e-05	9.931286e-05	5.054329e-05	1500	tags=47%, list=33%, signal=33%	12314/21898/70405/18176/108058/12540/20848/19353/21899/12313/16803/11848/11783/12475/12323/20296/330122/17395/18033/108078/21937/215449/17969/17874/17096/216799/66824/15894/17970/19878/20344/24088/19058/19094/21353/20779/68652/12028/17972/16150/21933/11651/22324/22329/117149/26417/16653/23797/12370/12367/20310/22059/26415/11303/12048/21939/22030/14083/56489/11307/17087/266632/12362/18018/56480/20…
mmu05145	mmu05145	Toxoplasmosis	95	0.404617034600382	1.74651583892809	2.262844e-04	1.177386e-03	5.992071e-04	1619	tags=54%, list=36%, signal=35%	15979/21898/16782/11689/11796/16412/11797/20848/16780/15980/18033/21937/17874/21809/21803/14679/24088/14678/16773/19094/16403/68652/16150/30955/11651/26417/320207/226519/23797/12370/12367/26415/12048/16777/21939/21808/17087/12774/266632/16451/16779/14681/16775/18035/21926/16452/19697/18036/29857/16776/54721
mmu04914	mmu04914	Progesterone-mediated oocyte maturation	81	0.412163398147252	1.7399077393099	4.063752e-04	1.879485e-03	9.565264e-04	1498	tags=52%, list=33%, signal=35%	268697/12428/18817/12235/12534/12532/20878/12442/56150/268930/12531/71890/14679/66156/14678/12566/52206/19094/56371/11514/56317/11651/26417/110651/68999/16653/18576/18667/23797/26415/20111/210044/11513/104111/26395/17120/12427/18707/99152/12530/59008/18708
mmu03015	mmu03015	mRNA surveillance pathway	29	0.496900029061521	1.73941150386098	4.260499e-03	1.233692e-02	6.278630e-03	1584	tags=62%, list=35%, signal=40%	21681/26931/66441/19053/17149/53817/56522/19047/71978/60365/192170/51792/73699/225849/269643/52432/21770/19045
mmu04933	mmu04933	AGE-RAGE signaling pathway in diabetic complications	94	0.402368056479534	1.73450752860219	2.825351e-04	1.397282e-03	7.111188e-04	1665	tags=60%, list=37%, signal=38%	13614/18176/12540/18799/20848/19353/12842/12825/12843/20296/12826/17126/12827/18033/18787/14268/21809/21803/15894/21812/19094/21813/12028/17390/11651/22329/26417/16653/23797/12367/12567/26415/22341/94216/21824/17128/21808/14066/18712/17127/18018/20293/18798/74055/18753/18127/18707/18803/21926/16452/18708/19697/234779/29857/16193/13058
mmu05100	mmu05100	Bacterial invasion of epithelial cells	58	0.431464376890003	1.72722915785551	7.399453e-04	3.158997e-03	1.607708e-03	1778	tags=69%, list=40%, signal=42%	67771/56378/11867/76709/12540/16412/19353/20416/11848/13043/12391/14268/71890/16402/12385/216148/20779/12390/15163/242687/56443/271849/68089/12550/67300/14083/140580/16202/13430/18707/22330/11461/12389/83767/18708/12757/19303/11465/12927/12387
mmu04390	mmu04390	Hippo signaling pathway	123	0.387024466078154	1.72623808360304	2.017301e-04	1.083486e-03	5.514186e-04	1621	tags=54%, list=36%, signal=35%	11799/22629/11796/11797/17125/22421/22630/27373/17126/18787/104318/93960/21809/216795/21803/22417/14365/19053/11839/20583/93737/12385/21812/14368/21414/16414/21813/54401/19047/93735/18759/71978/57265/242316/12161/22409/16897/22410/12550/22413/22420/12006/170770/22628/17128/21808/51792/73699/17127/72293/21415/22422/56274/22418/22627/12166/15901/269643/52432/11461/217325/12167/19045/13543/12156/121…
mmu05222	mmu05222	Small cell lung cancer	85	0.405876364640178	1.72272149098128	3.854607e-04	1.807865e-03	9.200766e-04	1916	tags=66%, list=43%, signal=39%	54124/16782/11796/16412/11797/16398/11783/16780/218772/12447/12826/12827/18033/14268/16400/12579/16410/16773/12566/16403/13555/13557/12028/16150/11651/12448/17187/226519/23797/12367/12567/22059/94216/12048/16777/22030/14083/12575/242705/27401/16779/18707/16775/18035/18708/19697/22029/16776/17869/22031/22642/11798/16151/12576/13197/19225
mmu04668	mmu04668	TNF signaling pathway	103	0.394671455100393	1.7222328407768	2.560900e-04	1.292090e-03	6.575835e-04	1961	tags=64%, list=44%, signal=37%	13614/17387/11796/11797/56532/20296/12977/330122/20311/17395/18033/21937/20297/26410/16182/15894/12702/19094/68652/16150/11651/21938/22329/26417/78284/12913/23797/12370/12367/20310/26415/22341/16878/22030/20312/26395/11491/231991/56613/20293/12981/14102/18707/12369/18035/21926/26398/18708/26408/19697/22029/21929/14825/16449/29857/16193/22031/26427/71609/11798/16151/19766/19225/66513/16476/18710
mmu04510	mmu04510	Focal adhesion	186	0.370942930805544	1.72042153044871	7.626249e-06	7.054281e-05	3.590135e-05	1805	tags=58%, list=40%, signal=36%	12834/12833/16416/20750/16782/18481/12540/11796/16412/11797/18595/19353/12334/12842/16398/20416/11848/16780/12843/109711/67268/12826/98932/12391/12827/22323/215449/192176/14784/104099/14268/21826/16400/21923/16410/224105/16402/21827/18720/192897/18596/19878/67938/16773/12835/216148/16403/20779/12390/19047/109700/170758/11651/22324/17906/18654/26417/14360/18479/15234/64099/228785/57342/226519/2379…
mmu05140	mmu05140	Leishmaniasis	63	0.423327698619423	1.71908918689362	1.104446e-03	4.326828e-03	2.202053e-03	2209	tags=75%, list=49%, signal=38%	15979/21898/16409/16412/15980/18033/17357/17969/17874/21809/21803/17970/24088/12266/19094/68652/14129/16414/17972/12946/26417/26415/21808/266632/16451/18035/21926/16452/19697/18036/29857/13058/246256/13712/18751/19225/14999/66513/16476/16401/16153/14281/14998/15170/16176/26409/18126
mmu04380	mmu04380	Osteoclast differentiation	110	0.390713847139571	1.71765510000202	2.115650e-04	1.118272e-03	5.691223e-04	1619	tags=52%, list=36%, signal=34%	15979/16416/13038/19353/16177/12977/15980/18033/21937/14784/16440/17969/14389/21803/22177/12311/17970/21812/19058/12702/19094/68652/12229/14129/20375/21813/15976/17972/16150/18034/11651/19698/26417/14360/15975/23797/26415/16822/20963/22030/21808/18733/26395/17060/18018/16451/18707/18035/16391/14283/21934/21926/18708/19697/234779/29857/54721
mmu04512	mmu04512	ECM-receptor interaction	75	0.410412771931955	1.71262802327018	1.065522e-03	4.274925e-03	2.175638e-03	1155	tags=47%, list=26%, signal=35%	12834/15366/12833/16416/20750/16782/16412/20969/12842/16398/16780/12843/12826/12827/104099/14268/21826/16400/21923/16410/16402/21827/12505/192897/16773/12835/16403/16423/109700/226519/21825/94216/16777/319480/11603
mmu04611	mmu04611	Platelet activation	111	0.389043827743527	1.71226544929972	1.703162e-04	9.950051e-04	5.063879e-04	1600	tags=51%, list=36%, signal=34%	14062/16416/16412/12842/16398/12825/11848/12843/18783/67268/19092/110135/22323/215449/16440/99571/17096/14679/19224/19878/14161/14678/67938/19094/20779/12229/14127/11514/19047/30955/11651/18759/26417/14360/320207/228785/23797/26415/16822/20963/210044/11513/104111/107589/18798/16801/19222/14674/18127/19091/18707/11461/18708/22371/234779/19045/29857
mmu04926	mmu04926	Relaxin signaling pathway	116	0.386520438189531	1.71086952508456	1.130807e-04	6.973313e-04	3.548928e-04	1509	tags=51%, list=34%, signal=35%	13614/18176/12842/20416/12825/14710/14702/12843/11475/14688/12826/17126/12827/17395/18033/14784/21803/14693/14679/21812/14696/14678/66066/216148/19094/20779/11514/21813/17390/11651/26417/216869/78284/16653/12913/23797/271849/26415/14676/22341/94216/210044/11513/104111/26395/231991/18798/18127/14709/18707/14681/18035/14697/14707/26398/64337/18708/19697/13649
mmu05168	mmu05168	Herpes simplex virus 1 infection	131	0.379202975280101	1.70136635838186	2.321054e-04	1.189094e-03	6.051655e-04	2187	tags=63%, list=49%, signal=33%	15979/16416/11796/11797/11783/20296/21681/13685/15980/18033/21937/17874/16402/24088/12266/332579/12702/20779/68652/13163/15976/12028/16150/19047/11651/142980/15975/23797/12370/12367/22059/20963/12048/22030/20383/56489/266632/12010/56480/20293/50930/16451/14964/15013/14102/18707/15007/18035/16391/21356/19744/21926/16452/18854/18708/19697/19247/71586/108014/19045/54721/16193/21354/12015/14991/22031…
mmu04210	mmu04210	Apoptosis	114	0.381190589497772	1.68385308481661	2.929797e-04	1.413946e-03	7.195994e-04	1538	tags=48%, list=34%, signal=33%	13032/11799/22142/18176/13038/11796/11797/13033/12334/11783/22143/16188/18033/21937/16440/11546/64138/13040/13030/13163/12028/16150/21933/11651/18049/26417/12333/13039/16653/23797/12370/12367/22059/12048/12984/16905/170770/22030/13368/26395/235587/20740/22146/12368/14102/18707/229445/12369/18035/11461/21926/18708/26408/19697/22029
mmu05212	mmu05212	Pancreatic cancer	74	0.403266717528095	1.67953073774897	1.987852e-03	6.754640e-03	3.437639e-03	1525	tags=57%, list=34%, signal=38%	12540/20848/19353/19361/17126/18033/64143/21809/21803/21812/21802/13555/13557/21813/12028/16150/170758/11651/26417/16653/18806/23797/19354/12567/22059/19765/12048/17128/21808/73341/26395/12575/17127/242705/56044/12578/16451/18707/18708/19697/13649/12190
mmu04650	mmu04650	Natural killer cell mediated cytotoxicity	93	0.386758558233774	1.66402825468453	9.936917e-04	4.085177e-03	2.079069e-03	1586	tags=47%, list=35%, signal=31%	15979/56554/18176/19353/20416/15980/14784/379043/22177/15894/19058/216148/14127/16414/15976/21933/170758/22324/26417/14360/18479/15975/16653/12367/19354/271849/16822/20963/26395/18018/57257/77777/12981/14964/14102/18707/18803/21926/18708/19247/23900/234779/22325/12506
mmu03440	mmu03440	Homologous recombination	28	0.478569033287842	1.66142837678443	9.284144e-03	2.434346e-02	1.238912e-02	1774	tags=68%, list=40%, signal=41%	19363/19361/268465/12189/623474/19366/19891/69745/12144/67967/18971/17535/68240/18972/21975/19360/12190/19365/74335
mmu03420	mmu03420	Nucleotide excision repair	55	0.419116478712552	1.66078282891095	4.100228e-03	1.211919e-02	6.167820e-03	1652	tags=53%, list=37%, signal=34%	17420/18538/69263/69241/16881/245841/106344/19891/69745/66467/22592/67967/59001/18973/72151/13870/18971/18974/56438/69833/13194/68240/19687/18972/67710/13872/66420/20022/71991
mmu04664	mmu04664	Fc epsilon RI signaling pathway	63	0.408655994960118	1.65950894398423	4.148912e-03	1.211919e-02	6.167820e-03	1600	tags=52%, list=36%, signal=34%	18176/11689/19353/18783/16331/14784/14389/17096/19094/12229/14127/170758/11651/22324/26417/14360/16653/23797/19354/26415/16822/20963/26395/57257/12981/18707/18803/21926/26398/18708/234779/22325/29857
mmu04115	mmu04115	p53 signaling pathway	65	0.404370078441432	1.64797292576606	4.482797e-03	1.286872e-02	6.549277e-03	1360	tags=48%, list=30%, signal=34%	268697/12534/20135/29870/12442/11783/12447/18787/67874/50883/12566/55948/12649/12028/21933/12448/12370/12367/12567/22059/53892/21825/12048/170770/64058/12575/12578/20724/20437/12521/14102
mmu04620	mmu04620	Toll-like receptor signaling pathway	93	0.380633604028994	1.63767564622009	1.639494e-03	5.934254e-03	3.020120e-03	2053	tags=62%, list=46%, signal=35%	21898/20750/13038/19353/21899/16803/12475/18033/170744/17874/26410/170743/24088/53791/19094/68652/15976/16150/11651/117149/26417/142980/15975/12519/23797/12370/26415/21939/56489/26395/17087/266632/56480/21897/16451/18707/18035/16391/21926/26398/18708/19697/29857/54721/16193/225471/22031/12524/20302/16151/19766/66513/16476/18710/20847/14281/54473/26400
mmu05163	mmu05163	Human cytomegalovirus infection	206	0.350359155615025	1.63719482289083	5.012262e-05	3.338166e-04	1.698893e-04	1917	tags=55%, list=43%, signal=33%	12314/12768/70405/18176/16416/18595/20848/19353/16177/12313/11848/14710/14702/20296/12765/13685/14688/18033/21937/14784/16440/19217/16410/14693/14679/19878/19219/14696/14678/19058/66066/19094/20779/13555/73181/11514/13557/12028/16150/16194/170758/11651/26417/78284/16653/12913/23797/12370/12367/19354/12567/22059/26415/22030/14083/210044/11513/20312/104111/26395/12774/12575/231991/12010/18018/56480…
mmu04540	mmu04540	Gap junction	81	0.387400922709115	1.63537535518032	2.844639e-03	9.286910e-03	4.726387e-03	1341	tags=44%, list=30%, signal=32%	14745/12534/22142/73710/18176/18595/22152/22154/22143/19092/104318/14784/16440/14609/22151/14679/18596/22153/14678/20779/67951/11514/23939/26417/21872/16653/15559/210044/11513/104111/26395/18798/18590/71785/22146/19091
mmu05202	mmu05202	Transcriptional misregulation in cancer	87	0.380730954000563	1.62197270602145	1.956522e-03	6.716719e-03	3.418340e-03	1913	tags=57%, list=43%, signal=34%	12428/16409/11796/11797/12475/16178/18791/17125/17395/18033/13714/12580/12394/15078/14129/20375/21813/12028/93735/17187/16480/15242/22059/12048/21939/14083/12575/18590/433759/12981/12427/235320/18854/19697/22029/15081/18053/16193/20466/20683/18510/17869/50701/22642/12524/15182/18792/53623/12576/13197
mmu04623	mmu04623	Cytosolic DNA-sensing pathway	54	0.408234342868426	1.61326425232129	8.099475e-03	2.157700e-02	1.098118e-02	2218	tags=67%, list=49%, signal=34%	77125/56532/18033/245841/216799/66824/54483/16150/74414/12370/12367/383619/56489/20016/69833/56629/12362/56480/70428/12369/18035/20018/19697/18036/66420/16193/67005/16151/19766/67065/56417/16176/15977/228607/16173/66491
mmu05170	mmu05170	Human immunodeficiency virus 1 infection	182	0.348194065140613	1.61169686505148	1.806631e-04	1.019675e-03	5.189431e-04	2190	tags=62%, list=49%, signal=33%	12314/268697/108012/12534/12532/21898/70405/18176/18481/12442/19353/12313/14710/14702/14688/18033/21937/12631/16440/17874/224105/14693/14679/14696/24088/14678/19058/66066/19094/68652/73181/12649/12028/16150/170758/11651/21938/26417/18479/11769/16653/23797/12370/12367/19354/26415/16885/12048/22030/14083/56438/26395/12774/266632/16886/13194/12010/18018/56480/11767/14964/15013/14102/14709/18707/1880…
mmu05146	mmu05146	Amoebiasis	84	0.380168301429764	1.61140168237155	2.730152e-03	9.001392e-03	4.581078e-03	1625	tags=55%, list=36%, signal=36%	21898/16409/16782/11847/16177/12842/11846/12825/12475/16178/16780/12843/109711/330122/12826/12827/18033/14268/21809/21803/24088/16773/16414/12479/226519/12367/20310/14676/94216/16777/21808/14083/18798/12981/16779/18707/16775/22330/21926/17831/60595/18708/19697/14825/16776/16193
mmu04621	mmu04621	NOD-like receptor signaling pathway	110	0.366146218689986	1.60965096190883	1.187686e-03	4.545972e-03	2.313582e-03	1968	tags=61%, list=44%, signal=35%	21898/12363/11796/11797/56532/11848/20296/330122/18033/195046/16440/67955/17874/216799/66824/13030/332579/54483/19094/21353/68652/19200/15976/16150/26417/15975/12370/20310/26415/192656/383619/12048/22030/56489/22334/266632/12362/56480/18439/20293/18798/22627/18753/17948/16451/18035/16391/21926/19697/22335/18036/21929/14825/29857/54721/16193/13058/56486/22031/11798/22051/18797/16151/19766/66513/16…
mmu05169	mmu05169	Epstein-Barr virus infection	171	0.348500313016777	1.60574954522279	3.077103e-04	1.463822e-03	7.449829e-04	2187	tags=64%, list=49%, signal=34%	12428/20848/19353/11783/12447/12495/18033/17874/17096/215446/19664/12505/15894/57296/24088/12566/19094/68652/13555/12229/13557/15976/12028/16150/17999/18034/11651/19698/12448/15975/23797/12370/12367/12567/22059/26415/20963/16453/21939/22030/56489/17060/12575/266632/12010/56480/242705/19184/433759/16451/14964/21762/15013/27401/12427/14128/18037/14102/18707/15007/18035/16391/21356/21926/26398/17463…
mmu04151	mmu04151	PI3K-Akt signaling pathway	300	0.334388792187027	1.59921335127662	3.535110e-05	2.469141e-04	1.256620e-04	1769	tags=50%, list=39%, signal=32%	14745/14062/21898/12834/22629/18176/12833/16416/18414/20750/16782/16412/20104/18595/19353/13874/12842/16398/12189/14710/14702/16780/12843/12977/13685/12447/22630/16188/14688/12826/12827/18033/26931/14784/104099/14268/21826/16400/16190/21923/12986/26987/16410/16402/21827/19053/14693/192897/12985/14178/11839/78405/18596/14696/74551/24088/13639/16773/66066/12835/21802/12566/105787/16403/13640/15976/…
mmu05160	mmu05160	Hepatitis C	126	0.357128313377622	1.59807178840894	1.381963e-03	5.058665e-03	2.574506e-03	1509	tags=47%, list=34%, signal=32%	22629/18176/53624/20848/12739/71908/12737/11783/22630/18033/21937/14784/19053/12702/12566/13555/13557/15976/12028/54401/18417/16150/54419/11651/26417/142980/15975/12740/71978/16653/23797/12370/12367/12567/22059/22628/22030/56489/26395/51792/12575/73699/56480/56173/242705/22627/16451/114141/269643/14102/18707/18035/16391/52432/21926/60363/18708/19697/13649
mmu05206	mmu05206	MicroRNAs in cancer	127	0.356965817599425	1.59785283919767	1.382398e-03	5.058665e-03	2.574506e-03	2002	tags=60%, list=45%, signal=34%	13078/12532/18176/16416/22003/18595/20848/15387/20416/12189/11848/16765/12447/12531/17395/18033/14784/22196/21923/14365/16402/12505/18596/13639/13555/13640/13557/13433/16150/17118/23939/12448/13436/26417/16653/18131/12367/271849/22059/21825/21808/216456/26395/12575/18712/242705/18590/12578/433759/20724/18707/18803/14660/17250/13637/12530/18591/18708/13649/234779/22350/74747/12703/17869/15461/1875…
mmu04814	mmu04814	Motor proteins	73	0.381024391376565	1.58328003637336	5.976757e-03	1.658550e-02	8.440859e-03	925	tags=37%, list=21%, signal=30%	326618/22142/73710/67665/22003/13427/22152/22154/69654/59069/22143/11475/67268/98932/22004/21956/17904/22151/22153/11468/234663/67938/67951/110084/17906/17886/22428
mmu04810	mmu04810	Regulation of actin cytoskeleton	211	0.337866455621448	1.58259012154402	2.853309e-04	1.397282e-03	7.111188e-04	1769	tags=54%, list=39%, signal=34%	14745/14062/19241/67771/56378/16409/18176/404710/11867/16416/76709/18481/12540/16412/18595/19353/237860/16398/20130/11848/66922/109711/67268/98932/17698/30938/12631/12274/104099/14268/16400/29875/226970/16410/224105/16402/18720/192897/14178/18596/19878/109828/20259/18643/67938/16403/20779/16414/19047/109700/18718/20430/170758/11651/14172/22324/17906/242687/26417/18479/101314/17886/228785/227753/1…
mmu04722	mmu04722	Neurotrophin signaling pathway	115	0.356888667331806	1.57795062211336	2.123593e-03	7.142995e-03	3.635284e-03	2025	tags=60%, list=45%, signal=34%	12314/73914/70405/18176/108058/12540/19353/12313/20416/11848/12323/11857/18033/215449/14784/78405/216148/19094/192662/72843/12028/16150/26401/23939/11651/23921/18049/26417/110651/16653/23797/271849/22059/26415/192656/20111/26395/17164/266632/22627/18753/19165/18037/18707/18803/18035/12315/18708/26408/19697/19247/234779/18036/29857/18053/12015/15461/20661/20112/12322/67071/12928/11350/16476/18710/…
mmu04061	mmu04061	Viral protein interaction with cytokine and cytokine receptor	81	0.373783227674871	1.57788957869422	5.361050e-03	1.525837e-02	7.765444e-03	2097	tags=59%, list=47%, signal=32%	12768/56744/93672/20308/16174/20305/20306/20296/56221/12765/12977/213208/330122/20311/21937/20297/16182/16194/21933/21938/20310/20312/57266/12774/20295/20293/50930/18829/57349/12772/21926/14825/329244/16193/17000/16186/13051/20302/16155/230979/16184/20300/20292/16153/12767/12145/227288/20290
mmu05152	mmu05152	Tuberculosis	139	0.349161334126414	1.57724037931705	1.911903e-03	6.631912e-03	3.375179e-03	1625	tags=44%, list=36%, signal=29%	15979/12314/21898/16409/70405/108058/13033/21899/12313/16803/11848/11783/12475/13115/12323/15980/18033/21937/17874/21809/21803/24088/13040/19058/12266/332579/19094/20779/14129/14127/20698/16414/12028/12946/11651/170767/117149/26417/23797/12370/12367/26415/192656/20963/225326/21808/242341/266632/18045/83430/21897/16451/12042/12315/21926/16452/19697/11975/27060/29857/16193
mmu04217	mmu04217	Necroptosis	99	0.362990649281216	1.57530852044416	3.651987e-03	1.126029e-02	5.730701e-03	2011	tags=56%, list=45%, signal=31%	15979/77125/21898/108058/11796/11797/68942/75608/20848/12334/56532/12323/18783/66371/15980/21937/216799/66824/68953/15289/15976/12028/21933/110078/12333/142980/15975/11739/12370/16453/22030/22334/12362/20479/66700/16451/14102/16391/21926/16452/22335/21929/54721/13058/225471/20852/71609/11798/12322/19766/116733/11687/20847/12325/208092
mmu04148	mmu04148	Efferocytosis	95	0.364415815816985	1.57298862839243	3.883914e-03	1.175767e-02	5.983829e-03	1190	tags=43%, list=26%, signal=32%	19128/108058/16416/11689/19353/11847/11846/12323/18613/19217/11863/21803/16410/11487/19219/16971/78070/19094/73181/20698/16423/12259/233571/12262/12260/26417/12367/20525/26415/192654/21825/11303/14083/20312/235584/26395/140580/11491/17164/12362/18018
mmu04350	mmu04350	TGF-beta signaling pathway	82	0.370684392568154	1.56670762261307	5.906804e-03	1.652912e-02	8.412166e-03	1786	tags=55%, list=40%, signal=34%	11848/17125/15903/17126/21809/75788/21803/12579/13179/19053/21812/21813/16323/104394/21781/26417/11477/242316/17130/12161/21825/17128/21808/56438/17129/51792/73699/17127/19650/12166/433759/15901/55994/13590/21926/14313/268977/12167/12156/12159/20466/20683/17869/26965/15182
mmu04934	mmu04934	Cushing syndrome	131	0.348861929849113	1.56523548035727	1.889764e-03	6.624119e-03	3.371213e-03	1272	tags=37%, list=28%, signal=28%	108058/12323/22421/12447/215449/12580/16440/17200/216795/11863/22417/12579/14365/218461/14679/14678/14368/21414/12566/13555/11514/13557/12448/93735/26417/78284/57265/12913/12567/22409/54652/22410/12288/22413/22420/12006/210044/11513/104111/26395/13079/12575/231991/21415/242705/18798/22422/22418/12578
mmu05164	mmu05164	Influenza A	113	0.354200572695908	1.56325817401621	2.976823e-03	9.624099e-03	4.897992e-03	1785	tags=49%, list=40%, signal=30%	15979/77125/21898/11783/20296/15980/18033/21937/17874/216799/66824/15894/170743/12702/19326/15976/12028/16150/21933/11651/26417/142980/15975/53869/11739/23797/12370/12367/12567/110196/56489/26395/266632/12362/56480/20293/16451/14102/18707/18035/16391/11461/21926/16452/18854/18708/19697/71586/18036/54721/16193/11465/22031/18751/71609
mmu04144	mmu04144	Endocytosis	176	0.338094602056553	1.56082489736317	1.090311e-03	4.322306e-03	2.199751e-03	1583	tags=48%, list=35%, signal=32%	67771/56378/11867/76709/12540/68942/106572/18595/75608/11848/98878/54673/14773/13196/12765/11773/66371/12391/234353/17126/11845/13855/75788/18720/259300/93737/21812/58194/20405/68953/232910/100017/20779/12390/70527/66201/19326/21813/17999/140500/107305/208650/18759/216439/70160/216869/22088/53869/71770/18806/56443/26385/68089/18571/69710/67300/78618/12774/215632/17127/11840/20479/218038/13430/667…
mmu04360	mmu04360	Axon guidance	168	0.338802469368509	1.55946247664143	8.074656e-04	3.361075e-03	1.710552e-03	2158	tags=64%, list=48%, signal=34%	18176/108058/18481/12540/16412/19353/237860/20130/20361/11848/20346/20564/12323/13837/67268/20359/98932/11854/12631/22417/224105/14365/14159/17974/14679/93737/19878/14678/13639/19058/67938/65254/13641/20350/20779/13640/73181/19876/20352/170758/108151/13844/20348/26417/14360/18479/13848/16653/19354/16885/107448/12934/245857/14083/16202/18209/16886/117600/14270/13846/22418/231637/20355/18186/107449…
mmu04657	mmu04657	IL-17 signaling pathway	68	0.379506435005379	1.5590717417498	9.377093e-03	2.439509e-02	1.241539e-02	2182	tags=66%, list=49%, signal=35%	20306/20296/330122/20311/17395/18033/20297/12985/19094/68652/16150/23939/26417/12370/12367/20310/26415/22030/56489/20295/56480/20293/12981/50905/18035/14283/21926/59008/19697/21929/14825/29857/16193/22031/71609/16151/16478/19225/16476/20292/14281/16171/56637/16176/26409
mmu05220	mmu05220	Chronic myeloid leukemia	74	0.372687950723513	1.55217587175466	8.945334e-03	2.364124e-02	1.203174e-02	1961	tags=64%, list=44%, signal=36%	18176/20416/18033/14784/14389/21809/21803/12394/21812/13017/216148/13555/13557/21813/12028/16150/11651/26417/16653/23797/12567/271849/22059/12048/17128/21808/26395/12575/17127/242705/12578/433759/18707/18035/18708/19697/19247/12015/17869/15461/15182/16151/12576/12928/13197/11350/18710
mmu04145	mmu04145	Phagosome	121	0.348263252330385	1.54906941234138	3.275917e-03	1.048923e-02	5.338285e-03	1853	tags=50%, list=41%, signal=30%	21898/22142/16409/73710/16416/16412/19353/13427/21899/22152/16398/12475/22154/22143/108078/100226/17969/21826/16410/22151/16402/21827/17970/22153/24088/13040/234663/12266/14129/67951/16414/17972/22319/53331/13039/21825/225326/20333/71116/53421/242341/22146/14964/15013/15007/11461/66290/66212/11975/27060/15239/13058/246256/11465/21354/66144/14991/16419/11974/235661/20335
mmu04640	mmu04640	Hematopoietic cell lineage	83	0.364938013586065	1.54428476782499	7.875738e-03	2.115017e-02	1.076395e-02	995	tags=33%, list=22%, signal=26%	12527/16409/16416/16177/16398/12475/16178/12977/16188/12489/12494/16400/16190/12986/16402/12505/12985/12490/16403/16156/14129/109700/16194/12946/12479/12982/16196
mmu05418	mmu05418	Fluid shear stress and atherosclerosis	119	0.344842035683323	1.53215194872359	4.120444e-03	1.211919e-02	6.167820e-03	1500	tags=49%, list=33%, signal=33%	12314/13614/70405/14873/16416/20969/19353/16177/12313/11848/16178/18791/20296/12391/17395/18033/21937/17969/18613/16410/15894/17970/14866/19094/105787/20779/14857/12390/16150/23939/17390/170758/11651/22329/13039/11477/23797/19354/22059/26415/21824/14083/56615/20293/18590/12166/211666/18127/18707/12315/11461/21926/12389/18591/26398/18708/26408/19697
mmu05165	mmu05165	Human papillomavirus infection	284	0.321212838747488	1.53207240702583	1.934410e-04	1.055997e-03	5.374288e-04	1816	tags=50%, list=40%, signal=32%	12428/12834/18176/12833/16416/20750/16782/12540/16412/12842/16398/16780/12843/22421/13685/12447/12826/12827/18033/26931/21937/14784/104099/14268/216795/21826/16400/21923/22417/16410/14365/16402/21827/19053/19664/192897/93737/18596/19219/93687/14368/16773/21414/12835/12566/16403/13555/16848/15976/12028/16150/109700/11651/12448/93735/18759/26417/142980/78284/15975/71978/57265/16653/12913/226519/237…
mmu04514	mmu04514	Cell adhesion molecules	123	0.343405995471963	1.53168742412685	3.474416e-03	1.091491e-02	5.554925e-03	1926	tags=50%, list=43%, signal=29%	16456/16409/53624/319504/16412/12560/20969/12739/71908/12737/20343/67374/13003/102657/104099/18613/16410/12490/15894/20344/16403/13052/12805/216856/16414/17967/18417/54419/21367/22329/18190/12740/20612/12519/12550/21939/245537/20345/56173/52118/11658/14964/114141/15013/15007/60363/94332/17123/83964/14991/19264/241568/16728/12524/269116/16408/17136/320840/12562/14999/12555
mmu05200	mmu05200	Pathways in cancer	479	0.314260529052239	1.53124995376422	1.106118e-05	9.444544e-05	4.806612e-05	1968	tags=53%, list=44%, signal=33%	15979/14745/12314/14062/11799/12428/13614/70405/14873/18176/108058/54124/16782/12540/11796/16412/11797/18595/20848/19353/19361/12313/14634/16398/11848/14710/11783/14702/16780/12323/59069/218772/22421/12447/16188/14688/12826/17126/15980/12827/17395/18033/19207/13617/14784/14268/64143/21809/216795/16400/19217/16190/11863/12986/21803/22417/12579/16410/14365/14693/12394/14178/14679/18596/12385/19878/…
mmu04370	mmu04370	VEGF signaling pathway	57	0.382035008116416	1.5245663236428	1.811799e-02	4.189786e-02	2.132308e-02	1775	tags=54%, list=40%, signal=33%	18176/12540/19353/18783/102626/19058/216148/19094/20779/20698/170758/11651/26417/16653/23797/19354/26415/14083/26395/17164/18127/18707/18803/18708/234779/29857/19303/15507/12015/15461/18751
mmu04060	mmu04060	Cytokine-cytokine receptor interaction	219	0.323570889351177	1.51905900953511	7.783854e-04	3.281042e-03	1.669821e-03	1720	tags=44%, list=38%, signal=29%	15979/77125/12768/56744/18414/93672/20308/16177/16174/20305/20306/16178/20296/56708/57914/56221/12765/12977/213208/330122/16188/320100/20311/15980/21937/20297/245527/24099/16182/21809/16190/12986/21803/12985/13607/21812/16156/21942/21813/15976/16194/21933/16323/21938/66102/18049/21949/242700/21950/15975/11477/242316/12982/53603/12161/20310/209590/16196/16847/16878/12984/16164/21944/21939/21808/18…
mmu04728	mmu04728	Dopaminergic synapse	113	0.342476564853993	1.51151446577879	6.059962e-03	1.667742e-02	8.487637e-03	2008	tags=54%, list=45%, signal=31%	12314/70405/108058/12313/14710/14702/12323/17161/14688/14802/26931/16440/19053/14693/14679/14696/14678/66066/19094/19047/11651/13491/216869/78284/71978/12913/23797/26415/12288/12286/11865/51792/231991/73699/18798/225849/269643/14709/14681/14697/12315/52432/14707/64337/12287/21770/19045/29857/606496/12289/26427/14704/18751/18797/12322/53623/14695/19052/12325/19055/14281
mmu04662	mmu04662	B cell receptor signaling pathway	70	0.365014964931316	1.50773674382201	1.564581e-02	3.775401e-02	1.921415e-02	2158	tags=64%, list=48%, signal=34%	18176/19353/26377/18033/16331/14784/17096/19058/12229/16150/170758/11651/22324/26417/16653/23797/19354/20963/18733/26395/17060/68713/18018/57257/12042/18037/18707/18035/18708/19697/234779/18036/22325/15461/18751/83490/16151/16476/18710/19055/14281/15985/15170/18019/56637
mmu05226	mmu05226	Gastric cancer	139	0.333068473150212	1.50454530208604	3.548690e-03	1.104405e-02	5.620650e-03	1241	tags=39%, list=28%, signal=29%	18176/20416/218772/22421/12447/17126/14784/21809/216795/21803/22417/12579/14365/14178/12385/21812/93687/14368/21414/216148/12566/13555/27412/13557/21813/12028/11651/14172/12448/93735/26417/15234/57265/16653/23797/16480/271849/22059/22409/22410/12550/14173/22413/22420/12006/17128/21808/26395/12575/17127/21415/242705/22422/22418
mmu04916	mmu04916	Melanogenesis	98	0.346800009001857	1.50314033843457	9.675339e-03	2.454487e-02	1.249162e-02	1241	tags=35%, list=28%, signal=26%	12314/13614/70405/18176/108058/12313/12323/22421/216795/22417/14365/14679/14678/14368/21414/11514/93735/26417/78284/57265/16653/12913/22409/22410/22413/22420/210044/11513/104111/26395/21415/18798/22422/22418
mmu05162	mmu05162	Measles	105	0.341403788221817	1.49299759523849	9.729499e-03	2.454487e-02	1.249162e-02	2187	tags=60%, list=49%, signal=32%	21898/20848/11783/12447/18033/17698/17874/170743/24088/12566/68652/13000/15976/12028/16150/11651/208650/12448/15975/23797/12370/12367/12567/22059/12048/16453/170770/56489/266632/56480/16451/14102/18707/18035/16391/18708/19697/71586/18036/21929/54721/16193/16186/12015/22031/71609/16151/12576/16184/16476/18710/20847/12444/14281/22062/13666/56417/68098/56637/16176/26409/15977/228607
mmu04520	mmu04520	Adherens junction	79	0.353776741321779	1.48765093409992	1.667215e-02	3.994120e-02	2.032727e-02	1509	tags=49%, list=34%, signal=33%	12540/19353/11848/109711/67268/98932/19271/215449/75788/29875/20583/12385/19878/21812/67938/21414/20779/20613/13000/21813/170758/17906/242687/26417/14360/21872/19354/22376/12550/17128/17127/21415/14158/22330/11461/60595/83767/12388/13649
mmu05410	mmu05410	Hypertrophic cardiomyopathy	92	0.34519796066293	1.48199123499237	1.319490e-02	3.254741e-02	1.656435e-02	1450	tags=47%, list=32%, signal=32%	326618/12293/13614/16416/16412/22003/16398/24051/59069/12391/22004/21956/104099/21809/16400/21803/16410/16402/192897/13346/12294/16773/108097/105787/16403/109700/19079/12297/17906/13405/54652/12288/16905/21808/319480/24052/110891/81904/13138/19082/11461/17897/21926
mmu05210	mmu05210	Colorectal cancer	83	0.349688320098082	1.47975361872359	1.772041e-02	4.126501e-02	2.100100e-02	1259	tags=42%, list=28%, signal=31%	11799/18176/19353/13874/11848/17126/14784/64143/21809/21803/11839/21812/21414/21802/17685/21813/12028/72993/170758/11651/26417/16653/23797/12367/19354/22059/12006/170770/17128/21808/26395/12575/17127/21415/56044
mmu04660	mmu04660	T cell receptor signaling pathway	115	0.333502885238694	1.47455252410616	9.662349e-03	2.454487e-02	1.249162e-02	2008	tags=52%, list=45%, signal=30%	18176/18481/12540/11848/18033/26931/14784/26410/224105/19053/17974/19058/19094/16150/11651/208650/22324/26417/14360/18479/71978/16653/23797/12567/26415/16822/26395/51792/73699/18018/57257/12981/225849/12042/269643/18037/18707/18803/18035/52432/21926/18708/19697/19247/21770/18036/22325/29857/17973/19264/15461/214230/16151/19052/16476/18710/16818/19055/16153/14281
mmu04915	mmu04915	Estrogen signaling pathway	87	0.346112965567129	1.47449472508399	1.717391e-02	4.055967e-02	2.064203e-02	1509	tags=44%, list=34%, signal=30%	12314/70405/16668/18176/13033/12313/20416/17395/14784/16440/14679/14678/21802/216148/20779/11514/17390/11651/26417/78284/16653/12913/18667/23797/271849/210044/11513/104111/26395/231991/18798/18753/18127/18707/14681/12315/18708/13649
mmu05412	mmu05412	Arrhythmogenic right ventricular cardiomyopathy	79	0.35055834899744	1.47411741482527	1.974334e-02	4.534159e-02	2.307570e-02	1206	tags=42%, list=27%, signal=31%	12293/16416/13511/16412/16398/24051/12391/109620/104099/16400/14609/16410/16402/192897/12385/13346/12294/16773/21414/16403/109700/12297/13405/16480/13506/67451/54652/12288/16905/319480/24052/110891/21415
mmu04550	mmu04550	Signaling pathways regulating pluripotency of stem cells	107	0.334131459900829	1.46453952113132	1.249199e-02	3.104353e-02	1.579898e-02	1818	tags=52%, list=40%, signal=32%	18176/20848/17125/15903/22421/17126/14784/216795/22417/14365/14368/21414/19094/16323/11651/93735/26417/57265/11477/16653/23797/22409/26415/22410/16878/14173/22413/22420/16453/12006/17128/26395/17129/17127/22422/22418/12166/15901/55994/16451/18508/18707/13590/16452/18708/12167/14183/13543/29857/12159/14182/17869/15461/12387/14362/84505
mmu04015	mmu04015	Rap1 signaling pathway	184	0.315054877434129	1.45926947961519	3.801500e-03	1.161376e-02	5.910589e-03	1841	tags=52%, list=41%, signal=32%	14745/12314/14062/16409/70405/18176/14293/16416/12540/16412/18595/19353/12313/20130/11848/12977/22323/215449/64143/14178/14679/93737/18596/11541/14678/18643/13639/19094/20779/13640/11514/16414/170758/11651/14172/22324/18759/18049/18654/26417/15234/16653/23797/19354/26415/16822/12550/21825/22341/14173/210044/11513/104111/26395/11540/12801/18798/18590/74055/71785/57257/56044/20469/15901/21844/18707…
mmu05414	mmu05414	Dilated cardiomyopathy	96	0.336085093889074	1.45230629635432	1.757034e-02	4.120367e-02	2.096978e-02	1121	tags=38%, list=25%, signal=29%	326618/12293/16416/16412/22003/16398/24051/59069/12391/22004/21956/104099/21809/16400/21803/16410/16402/192897/13346/12294/16773/16403/11514/109700/12297/17906/13405/54652/12288/16905/21808/319480/210044/11513/24052/104111
mmu04014	mmu04014	Ras signaling pathway	197	0.307073167739456	1.4304862760712	6.753300e-03	1.843319e-02	9.381202e-03	2014	tags=52%, list=45%, signal=30%	12314/70405/18176/18481/12540/18595/19353/12313/20130/20416/11848/14710/14702/26970/18783/66922/12977/14688/18033/215449/11845/14784/64143/14389/224105/14693/14178/78405/18596/14696/13639/66066/21802/216148/13640/16150/23871/170758/11651/14172/18049/18654/26417/18479/15234/16653/18806/23797/19354/271849/19765/22341/14173/12048/26395/56480/18590/74055/71785/56044/21844/14709/18707/18803/18778/1469…
mmu04071	mmu04071	Sphingolipid signaling pathway	108	0.324377189065551	1.42274767048921	2.051282e-02	4.646782e-02	2.364887e-02	1785	tags=54%, list=40%, signal=33%	18176/13033/19353/11848/20773/18033/26931/21937/14389/11886/11542/19053/14679/19878/14739/14678/19094/14127/20698/12028/170758/11651/26417/14360/71978/16653/18806/23797/19354/22059/26415/22030/26395/51792/73699/208449/18798/14674/225849/269643/18127/18707/17250/52432/21926/18708/26408/19697/21770/230379/29857/13610/18386/13244/20397/15461/18751/71609
mmu04310	mmu04310	Wnt signaling pathway	131	0.316845215381056	1.42158639410832	1.448819e-02	3.547476e-02	1.805417e-02	2018	tags=52%, list=45%, signal=29%	108058/19353/11848/12323/22421/27373/93960/216795/22417/14365/19878/13017/93687/19058/14368/21414/17393/73181/27412/13000/106042/170758/93735/57265/93840/19354/22059/22409/22410/22413/22420/12006/17128/56438/17127/18018/72293/21415/18798/22422/22418/56505/20437/14283/81004/21372/208846/13543/243548/67772/17869/26965/18751/12387/14362/18797/12322/212398/229658/76441/93897/20379/16476/16973/12444/1…
mmu04921	mmu04921	Oxytocin signaling pathway	125	0.317601949344187	1.41920385148371	1.682440e-02	4.001803e-02	2.036637e-02	2139	tags=59%, list=48%, signal=32%	12314/12293/70405/18176/108058/12313/11848/12323/18783/98932/16440/12494/17904/14679/19878/12294/14678/19058/108097/105787/20779/73181/11514/19047/30955/23939/19079/12297/26417/320207/228785/16653/54652/12288/210044/11513/207565/104111/26395/12575/107589/18018/18798/81904/18127/19082/14681/12315/11461/13649/19045/11465/13712/12299/12289/15461/18751/18797/12322/108099/19225/18430/16476/12325/19055…
mmu05225	mmu05225	Hepatocellular carcinoma	136	0.314136354334293	1.41558682385297	1.537335e-02	3.736735e-02	1.901736e-02	1961	tags=54%, list=44%, signal=32%	14873/18176/20416/22421/17126/14784/21809/216795/21803/22417/14365/21812/14866/93687/14368/21414/21802/216148/13555/14857/27412/13557/21813/12028/11651/93735/26417/15234/57265/16653/23797/12567/271849/22059/22409/22410/12048/22413/22420/12006/17128/21808/56615/26395/12575/17127/21415/242705/22422/22418/211666/12578/18707/18803/11461/18708/13649/234779/13543/66447/11465/13712/12015/17869/15461/187…
mmu04010	mmu04010	MAPK signaling pathway	277	0.275398131822037	1.31140477498251	2.010304e-02	4.585146e-02	2.333518e-02	1952	tags=48%, list=43%, signal=29%	12293/18176/26921/12540/18595/19353/16177/13874/20130/12475/16765/18783/66922/12977/12531/18033/56692/21937/215449/13714/192176/14784/17874/26410/21809/21803/224105/14178/11839/78405/18596/21812/12294/102626/13639/19058/21802/19094/68652/13640/13163/21813/16150/26401/23939/18034/170758/11651/12297/19698/14172/18049/18654/26417/216869/17187/110651/18479/15234/16653/23797/12367/19354/22059/54652/26…
mmu05142	mmu05142	Chagas disease	100	0.378808718366786	1.64593	1.037834e-03	4.214619e-03	2.144946e-03	1500	tags=47%, list=33%, signal=32%	15979/21898/21899/20296/17126/15980/18033/18787/21937/17874/21809/21803/19053/14679/21812/24088/14678/12266/19094/21813/12259/16150/11651/12262/12260/26417/71978/23797/12370/26415/14676/21808/51792/73699/266632/20293/18798/269643/14102/18707/14681/18035/52432/21926/26398/18708/19697
mmu00140	mmu00140	Steroid hormone biosynthesis	52	-0.300063	-1.5547	1.238439e-02	3.100754e-02	1.578067e-02	763	tags=33%, list=17%, signal=27%	13090/13112/112417/13076/72094/94215/15483/100559/13106/394432/105349/15494/208665/15486/94224/13123/394435
mmu04932	mmu04932	Non-alcoholic fatty liver disease	138	-0.248687	-1.564	4.208778e-04	1.919895e-03	9.770920e-04	923	tags=38%, list=21%, signal=31%	74769/407785/68375/66576/78943/66142/12857/68342/66594/72900/384783/13063/22272/54405/16334/18706/67130/20181/12864/75406/12866/68349/12868/16367/17992/227197/66046/26416/226646/67003/66218/68194/12865/66694/68465/66377/66108/108079/66945/68198/26414/70316/66052/225887/67273/67680/66445/13106/78330/22259/12862/17995/22273
mmu00430	mmu00430	Taurine and hypotaurine metabolism	15	-0.461314	-1.66972	2.093596e-02	4.710591e-02	2.397361e-02	629	tags=60%, list=14%, signal=52%	14415/14417/12583/14261/55990/14262/14263/14598/246277
mmu05415	mmu05415	Diabetic cardiomyopathy	171	-0.260318	-1.68419	4.179099e-05	2.840081e-04	1.445403e-04	933	tags=41%, list=21%, signal=34%	13057/74769/11937/18795/407785/68375/11951/228033/66576/66142/12857/68342/67126/53313/66594/72900/11957/22272/54405/16334/18706/67130/18597/12864/12896/75406/12866/68349/12868/66043/20191/12491/71679/16367/17992/227197/66046/26416/226646/67003/66218/68194/12865/66694/66377/22333/66108/66945/68198/26414/70316/66052/225887/11949/67273/67680/66445/11946/68263/232493/78330/12895/12862/17995/22273/567…
mmu00860	mmu00860	Porphyrin metabolism	37	-0.358556	-1.69798	6.872961e-03	1.860728e-02	9.469805e-03	514	tags=35%, list=11%, signal=31%	112417/14151/72094/94215/67417/17025/77697/100559/394432/22276/226139/12892/394435
mmu05208	mmu05208	Chemical carcinogenesis - reactive oxygen species	177	-0.26618	-1.73364	8.519411e-06	7.667470e-05	3.902205e-05	946	tags=41%, list=21%, signal=34%	12675/13057/74769/407785/68375/11951/228033/66576/20663/66142/17295/12857/68342/67126/66594/72900/11957/11836/20662/22272/54405/18706/109880/67130/110157/12864/75406/12866/68349/12868/13076/66043/71679/17992/227197/66046/68214/26416/226646/67003/66218/68194/12865/66694/66377/22333/58810/66108/66945/68198/26414/14872/70316/66052/225887/11949/67273/67680/66445/13106/11946/22339/78330/12359/13107/12…
mmu00330	mmu00330	Arginine and proline metabolism	43	-0.360101	-1.78608	1.683778e-03	6.029012e-03	3.068345e-03	504	tags=35%, list=11%, signal=31%	12709/66194/14431/75986/338403/69215/11669/11671/67092/18263/110695/13142/66988/56752/212647
mmu00120	mmu00120	Primary bile acid biosynthesis	16	-0.487981	-1.81383	9.519868e-03	2.454487e-02	1.249162e-02	485	tags=38%, list=11%, signal=34%	104086/20280/208665/17117/93732/13123
mmu00310	mmu00310	Lysine degradation	36	-0.390157	-1.83826	1.260501e-03	4.769850e-03	2.427520e-03	578	tags=36%, list=13%, signal=32%	13382/74147/93747/19193/78920/110446/11669/11671/110695/23923/270076/56752/15107
mmu00010	mmu00010	Glycolysis / Gluconeogenesis	53	-0.35972	-1.87037	7.361601e-04	3.158997e-03	1.607708e-03	779	tags=42%, list=17%, signal=35%	230163/18597/68738/11532/13382/235339/11522/56012/11529/21991/11676/58810/66681/68263/18642/319625/11669/14121/11671/110695/56752/60525
mmu00900	mmu00900	Terpenoid backbone biosynthesis	15	-0.528682	-1.91355	5.630331e-03	1.588899e-02	8.086381e-03	567	tags=53%, list=13%, signal=47%	56075/67422/208715/192156/319554/15357/110446/71365
mmu00250	mmu00250	Alanine, aspartate and glutamate metabolism	29	-0.435199	-1.92825	1.287914e-03	4.818825e-03	2.452445e-03	515	tags=34%, list=11%, signal=31%	109900/70503/11565/268782/11484/52633/11898/214579/268860/212647
mmu04714	mmu04714	Thermogenesis	162	-0.299981	-1.93138	1.274016e-06	1.696989e-05	8.636485e-06	908	tags=41%, list=20%, signal=34%	407785/68375/11951/14683/228033/66576/432530/20663/66142/12857/27425/68342/67126/66594/72900/11957/271639/74370/20662/22272/54405/67130/12163/12864/12896/75406/12866/11958/68349/208647/12868/23945/66043/71679/17992/227197/66046/26416/226646/67003/66218/68194/12865/66694/66377/19017/66108/108079/66945/68198/11515/70316/66052/225887/11949/67273/67680/66445/11946/78330/12895/12862/17995/22273/56717/…
mmu00040	mmu00040	Pentose and glucuronate interconversions	27	-0.449655	-1.94918	1.793762e-03	6.354498e-03	3.233995e-03	644	tags=41%, list=14%, signal=35%	112417/72094/94215/58810/67880/100559/394432/71755/20322/102448/394435
mmu00511	mmu00511	Other glycan degradation	16	-0.529928	-1.96975	4.000559e-03	1.200168e-02	6.108013e-03	275	tags=38%, list=6%, signal=35%	66848/12091/71665/15212/18010/23956
mmu00270	mmu00270	Cysteine and methionine metabolism	40	-0.425249	-2.06503	1.890067e-04	1.048987e-03	5.338610e-04	724	tags=45%, list=16%, signal=38%	12116/14630/20603/12583/229709/104923/246221/268782/12036/269378/232087/107869/74340/14711/17449/12035/12411/14854
mmu01230	mmu01230	Biosynthesis of amino acids	66	-0.380754	-2.08263	1.618924e-05	1.283576e-04	6.532501e-05	515	tags=33%, list=11%, signal=30%	109900/110639/56012/66194/21991/11428/170718/11676/12036/18642/232087/107869/18478/15929/11429/11898/12035/18563/109652/12411/108037/269951
mmu00340	mmu00340	Histidine metabolism	18	-0.55035	-2.12376	1.133336e-03	4.388384e-03	2.233380e-03	296	tags=56%, list=7%, signal=52%	140483/11484/338403/71761/11669/11671/110695/56752/14317/243537
mmu00053	mmu00053	Ascorbate and aldarate metabolism	24	-0.508901	-2.13566	4.611153e-04	2.047352e-03	1.041959e-03	644	tags=50%, list=14%, signal=43%	112417/72094/94215/58810/56727/100559/394432/11669/11671/110695/56752/394435
mmu01212	mmu01212	Fatty acid metabolism	40	-0.451705	-2.1935	3.421853e-05	2.469141e-04	1.256620e-04	705	tags=45%, list=16%, signal=38%	12896/11430/54397/74147/11370/231086/11364/66885/20280/93747/20249/113868/110446/12895/80911/56473/15107/11409
mmu00561	mmu00561	Glycerolipid metabolism	41	-0.453321	-2.22303	3.559121e-05	2.469141e-04	1.256620e-04	772	tags=51%, list=17%, signal=43%	55979/217480/104418/14732/23945/116939/14626/227333/320127/18946/58810/110524/16956/11669/11671/110197/110695/235582/56752/67800/28169
mmu03320	mmu03320	PPAR signaling pathway	69	-0.40647	-2.23683	9.510970e-07	1.439615e-05	7.326633e-06	741	tags=38%, list=16%, signal=32%	20181/11814/12896/11806/11430/14626/12491/74147/104086/109264/208715/11364/20280/11832/20249/113868/14077/11807/16956/22259/12895/80911/26458/56473/93732/17436
mmu00450	mmu00450	Selenocompound metabolism	13	-0.698542	-2.40196	1.772695e-04	1.017771e-03	5.179743e-04	821	tags=77%, list=18%, signal=63%	109079/26462/238505/50880/211006/23972/23971/107869/21743/20768
mmu01240	mmu01240	Biosynthesis of cofactors	115	-0.403961	-2.46404	2.376346e-10	7.913233e-09	4.027281e-09	656	tags=37%, list=15%, signal=33%	14630/67375/112417/20751/13382/192185/14151/72094/94215/11637/98256/319945/58810/13361/67417/66454/11565/17025/77697/100559/394432/12036/232087/11669/11671/11639/75735/15445/56248/14287/22276/12035/78914/107766/226139/12892/71562/108037/14854/394435/108156/209176/71743
mmu00670	mmu00670	One carbon pool by folate	32	-0.555553	-2.53117	3.240811e-06	3.685915e-05	1.875873e-05	611	tags=56%, list=14%, signal=49%	229709/13382/13361/107747/269378/232087/107869/74340/434437/218865/14711/110695/192166/14317/12411/108037/74129/108156
mmu00380	mmu00380	Tryptophan metabolism	37	-0.53778	-2.54671	1.473511e-06	1.887228e-05	9.604667e-06	624	tags=54%, list=14%, signal=47%	13076/266645/13382/74147/98256/93747/78920/110446/11669/11671/21743/110695/12359/23923/270076/107766/56752/15107/71562/209176
mmu00785	mmu00785	Lipoic acid metabolism	13	-0.753506	-2.59096	2.346096e-05	1.816860e-04	9.246547e-05	739	tags=85%, list=16%, signal=71%	18597/13382/235339/13171/117147/78920/68263/18293/12040/434437/12039
mmu01200	mmu01200	Carbon metabolism	98	-0.450544	-2.64687	1.405075e-11	5.200890e-10	2.646889e-10	779	tags=48%, list=17%, signal=41%	230163/76282/18597/68738/227095/11430/11532/13382/235339/73724/56185/20916/110639/56012/21991/109264/11428/110821/170718/56451/11676/66945/93747/20917/66052/104776/67680/78920/68263/18642/18293/110446/434437/14121/15929/12359/11429/17449/80911/235582/18563/66904/11409/108037/17436/269951/60525
mmu00260	mmu00260	Glycine, serine and threonine metabolism	36	-0.566746	-2.67027	1.314247e-07	2.735276e-06	1.392064e-06	578	tags=56%, list=13%, signal=49%	13382/56012/14431/268782/19193/26912/107869/434437/67092/218865/14711/76238/110695/13142/235582/192166/12411/108037/27364/74129
mmu00410	mmu00410	beta-Alanine metabolism	26	-0.623877	-2.69169	1.561340e-06	1.925653e-05	9.800226e-06	732	tags=73%, list=16%, signal=62%	14417/99586/227095/11430/74147/93747/104776/338403/11669/11671/110695/80911/103149/268860/56752/64705/11409/56690/246277
mmu00071	mmu00071	Fatty acid degradation	39	-0.573568	-2.76446	7.243011e-08	1.722802e-06	8.767856e-07	705	tags=59%, list=16%, signal=50%	12896/11430/11532/74147/11522/11370/11529/231086/11364/66885/93747/113868/71519/110446/11669/11671/12895/110695/80911/270076/56752/15107/11409
mmu00620	mmu00620	Pyruvate metabolism	41	-0.579066	-2.83967	2.746397e-08	7.035000e-07	3.580323e-07	764	tags=63%, list=17%, signal=53%	74156/18597/66204/68738/14651/11532/13382/235339/11522/11529/109264/58810/68263/75572/100705/110446/11669/11671/76238/110695/17449/18563/56752/52815/17436/60525
mmu00770	mmu00770	Pantothenate and CoA biosynthesis	19	-0.741899	-2.91126	2.898885e-07	4.836518e-06	2.461449e-06	316	tags=63%, list=7%, signal=59%	66812/99586/209558/12036/11669/11671/75735/103149/12035/64705/71743/246277
mmu00630	mmu00630	Glyoxylate and dicarboxylate metabolism	27	-0.678039	-2.93918	7.822611e-08	1.736620e-06	8.838178e-07	578	tags=63%, list=13%, signal=55%	13382/73724/56185/11428/110821/110446/434437/76238/12359/11429/68180/17449/235582/66904/71562/108037/60525
mmu00650	mmu00650	Butanoate metabolism	24	-0.742292	-3.11511	2.322372e-09	6.444583e-08	3.279842e-08	639	tags=75%, list=14%, signal=65%	233801/74147/208715/93747/217666/117147/67041/233799/110446/20216/15356/272428/214579/78894/268860/15107/11409/71911
mmu00020	mmu00020	Citrate cycle (TCA cycle)	29	-0.70434	-3.12075	1.102048e-09	3.336200e-08	1.697892e-08	578	tags=62%, list=13%, signal=54%	13382/235339/20916/11428/170718/56451/66945/20917/66052/67680/78920/68263/18293/15929/11429/17449/18563/269951
mmu00190	mmu00190	Oxidative phosphorylation	114	-0.516907	-3.15017	1.221946e-17	1.017270e-15	5.177193e-16	1068	tags=64%, list=24%, signal=50%	73834/28080/70383/12861/12867/66925/11984/595136/69875/12859/57423/66237/11973/407785/68375/11951/228033/66576/66142/12857/27425/76252/68342/67126/66594/11966/72900/11957/13063/22272/54405/67130/12864/75406/12866/11958/68349/11964/12868/66043/71679/17992/227197/66046/11944/110935/226646/74776/67003/66218/68194/12865/66694/66377/66108/66945/21871/68198/70316/66052/225887/11949/67273/67680/66445/11…
mmu01210	mmu01210	2-Oxocarboxylic acid metabolism	29	-0.752737	-3.33519	1.405646e-11	5.200890e-10	2.646889e-10	753	tags=72%, list=17%, signal=61%	76282/18597/217214/13382/235339/13171/11428/170718/268782/78920/12036/68263/18293/12040/15929/11429/12039/23923/12035/109652/269951
mmu04146	mmu04146	Peroxisome	78	-0.614862	-3.46889	4.142866e-18	4.598582e-16	2.340356e-16	564	tags=54%, list=13%, signal=48%	74147/19298/56185/19300/70503/56535/19302/76263/67993/74114/18634/71382/20280/113868/224824/110959/19193/28200/67420/111175/16922/51798/228061/19305/12359/80911/19301/69129/26458/13142/15356/14712/20655/17117/93734/13850/668173/93732/12908/56690/20656/269951
mmu00640	mmu00640	Propanoate metabolism	28	-0.793622	-3.47907	3.069437e-13	1.703537e-11	8.669813e-12	723	tags=82%, list=16%, signal=69%	68738/380660/227095/11430/13382/74147/73724/20916/13171/110821/56451/93747/20917/104776/100705/12040/80911/12039/268860/66904/11409/56690/60525
mmu00280	mmu00280	Valine, leucine and isoleucine degradation	44	-0.771034	-3.84298	2.091866e-18	3.482958e-16	1.772582e-16	578	tags=80%, list=13%, signal=70%	13382/74147/73724/13171/110821/231086/208715/11364/66885/93747/113868/268782/66948/104776/67041/12036/11992/12040/110446/11669/11671/110695/72039/12039/15356/12035/78894/268860/56752/15107/58875/66904/11409/78038/56357

## Sheet: Arg2
	ID	Description	setSize	enrichmentScore	NES	pvalue	p.adjust	qvalue	rank	leading_edge	core_enrichment
mmu03010	mmu03010	Ribosome	84	0.754953464637336	3.3531425973463	5.516947e-31	1.837143e-28	1.144041e-28	676	tags=82%, list=15%, signal=71%	20042/26451/66475/19988/20104/19896/20102/20116/319195/67025/27370/20084/20088/20085/20005/19946/270106/67281/67891/66480/65019/67427/20091/19989/11837/269261/110954/19899/19933/19944/16785/27367/267019/67248/78294/20115/16898/76846/27176/19941/20055/114641/67671/20054/20103/54127/68052/27050/26961/20068/100503670/19982/56040/22121/19942/19981/68436/54217/67097/19934/19921/75617/19951/76808/27207…
mmu03030	mmu03030	DNA replication	35	0.704436970957803	2.65849600779554	5.321516e-11	2.215081e-09	1.379393e-09	1129	tags=89%, list=25%, signal=67%	19891/18538/17217/19076/17215/69745/69263/17218/17220/72151/18973/17216/67967/16881/19819/18974/106344/69724/17219/18969/19075/18971/68240/18972/18968/59001/19687/327762/67153/14156/381760
mmu04110	mmu04110	Cell cycle	132	0.529445692698933	2.50733813288352	1.131324e-14	7.534616e-13	4.692016e-13	1430	tags=64%, list=32%, signal=45%	71890/18538/17217/12544/22629/56452/17215/56150/12566/17218/17220/26931/22137/12534/67141/12447/22630/13557/17216/268930/23834/12235/27214/18392/12428/21781/12545/19053/268697/17219/26429/12236/12448/13555/52206/12649/18817/73699/12237/54401/12530/12532/50883/104394/105988/17126/56438/12531/22059/13006/27401/19650/56317/12581/24061/56371/21803/242705/107995/66156/12567/55948/68999/17127/51792/124…
mmu03430	mmu03430	Mismatch repair	22	0.691967161303557	2.32537851967173	1.126581e-06	1.974482e-05	1.229565e-05	1267	tags=86%, list=28%, signal=62%	19891/18538/26909/69745/69263/72151/67967/16881/18861/106344/18971/68240/18972/17685/19687/17350/381760/17688/68275
mmu05171	mmu05171	Coronavirus disease - COVID-19	200	0.455632289766535	2.25112967133724	3.671295e-13	2.037569e-11	1.268851e-11	676	tags=42%, list=15%, signal=37%	14161/99571/20042/26451/66475/19988/20104/19896/20102/20116/319195/67025/27370/110135/20084/20088/20085/20005/26415/19946/270106/67281/67891/66480/65019/67427/20091/19989/11837/269261/110954/19899/19933/19944/16785/20848/74145/27367/267019/67248/78294/20115/21937/16898/76846/27176/19941/20055/114641/67671/20054/20103/54127/68052/27050/26961/20068/100503670/19982/56040/22121/19942/16150/19981/6843…
mmu03410	mmu03410	Base excision repair	37	0.588068168503131	2.24409653981163	1.993048e-06	2.819360e-05	1.755695e-05	1128	tags=68%, list=25%, signal=51%	18538/69745/69263/11546/22256/72151/18973/67967/16881/18974/234258/106344/70603/11792/18971/21665/18972/18294/59001/19687/15289/71726/14156/18970/235587
mmu03040	mmu03040	Spliceosome	118	0.469301619798356	2.19215096658056	1.815262e-08	5.495292e-07	3.422072e-07	2109	tags=79%, list=47%, signal=43%	76522/72654/20643/66585/66373/68011/67678/230596/66094/20630/15382/66101/20638/20639/76938/15387/20641/17149/66441/101943/56070/68988/53817/107686/56031/21681/53317/70052/78651/27756/75062/68981/229279/66125/20624/74351/68183/68816/76936/13204/11834/20227/20222/66642/225160/20637/66810/67439/66877/28000/20383/60365/68479/57905/67039/192170/319322/50783/19655/217207/107701/67959/56194/108014/10812…
mmu03420	mmu03420	Nucleotide excision repair	55	0.51797595178315	2.13797897648289	2.339579e-06	3.116319e-05	1.940619e-05	1405	tags=60%, list=31%, signal=42%	19891/17420/18538/69745/69263/245841/72151/18973/67967/16881/18974/106344/69833/69241/18971/66467/56438/13194/68240/18972/22592/59001/19687/13870/67710/66420/20022/13872/71991/68275/14885/72584/99375
mmu03440	mmu03440	Homologous recombination	28	0.583858352170437	2.08872705615078	6.106829e-05	5.083935e-04	3.165909e-04	1267	tags=68%, list=28%, signal=49%	19891/12189/623474/19361/268465/69745/12144/19366/19363/67967/18971/68240/18972/17535/12190/21975/19360/381760/68275
mmu04114	mmu04114	Oocyte meiosis	107	0.439457941957167	2.0244064621415	7.528402e-07	1.566849e-05	9.757205e-06	1412	tags=55%, list=31%, signal=39%	71890/108058/70405/22629/56150/12566/26415/26931/12534/67141/12447/22630/268930/12235/12314/19053/12313/268697/12448/52206/20878/18817/73699/54401/19094/12532/19047/12323/105988/56438/13006/56317/16440/24061/107995/26395/66156/68999/110651/51792/12442/26417/59008/17120/22627/22628/19045/21770/50878/20111/26965/12315/18667/104111/12325/29857/19058/225849/217232
mmu03050	mmu03050	Proteasome	43	0.508299069260336	2.00405567339331	8.306754e-05	6.432905e-04	4.005950e-04	1751	tags=74%, list=39%, signal=46%	26442/21762/57296/26444/26445/19185/19184/19179/23997/19166/17463/66537/19188/26440/26443/19182/19167/19172/19186/59029/228769/19170/19171/69077/26441/70247/19173/66997/19192/23996/19175/26446
mmu05222	mmu05222	Small cell lung cancer	85	0.442529373256975	1.96940789021068	1.180527e-05	1.268114e-04	7.896903e-05	1260	tags=51%, list=28%, signal=37%	54124/12566/16412/12447/13557/218772/16782/12826/12028/12827/16400/16780/16403/12448/16150/13555/16398/11783/16410/11797/22059/27401/14083/226519/12048/11651/242705/12567/16777/12367/22030/18033/11796/14268/16151/17187/94216/16773/12579/16779/23797/12575/16776
mmu04530	mmu04530	Tight junction	128	0.406578180902298	1.91930970654248	3.349215e-06	4.289572e-05	2.671236e-05	1740	tags=62%, list=39%, signal=39%	67771/11867/18538/76709/12540/13043/56378/22143/16412/19353/22142/67268/70737/11848/56173/56449/19053/109711/16456/53624/105787/17698/21873/73699/19079/67374/22323/17999/17904/18759/60363/68328/12737/19878/12739/71908/98932/21872/26401/16897/12567/12638/217325/83814/20779/56443/108097/12479/17886/51792/72058/18417/93737/52432/68089/60595/22146/75723/12394/71978/12740/67938/108099/22350/77579/1680…
mmu04623	mmu04623	Cytosolic DNA-sensing pathway	54	0.458431615093135	1.88710368300979	1.840948e-04	1.202031e-03	7.485381e-04	2110	tags=69%, list=47%, signal=37%	245841/56532/77125/69833/16150/74414/12370/66824/12367/12369/18033/66420/20018/20016/54483/56480/70428/16151/18036/216799/56489/228607/56629/66491/67005/19766/19697/16193/218832/78929/67486/67065/56417/383619/12362/14082/18035
mmu03460	mmu03460	Fanconi anemia pathway	19	0.571397906719784	1.84918986028114	2.745939e-03	1.235673e-02	7.694880e-03	1373	tags=68%, list=31%, signal=48%	19891/12189/19361/268465/12144/18861/68240/13870/12190/17350/21975/68275/67030
mmu05132	mmu05132	Salmonella infection	168	0.379110234433148	1.84161240691728	5.245870e-06	6.238838e-05	3.885099e-05	1934	tags=64%, list=43%, signal=38%	67771/11867/76709/12540/13427/67665/56378/69654/22143/22154/26415/20130/19353/56532/22142/12028/21937/67268/11848/22151/27050/20430/16150/11840/22152/73710/19094/18643/17874/192176/234663/12370/11797/117149/19878/21898/68652/98932/12475/101314/21933/11651/22428/26395/13430/67951/66824/56443/12367/22030/12369/18033/192656/11796/56455/26417/18645/53791/12363/17087/18481/225326/26398/18479/56044/680…
mmu04218	mmu04218	Cellular senescence	130	0.385624301493459	1.82279622498603	4.302337e-05	3.770206e-04	2.347813e-04	1380	tags=45%, list=31%, signal=32%	13685/12334/70405/66922/18176/12566/26415/12534/20130/12447/13557/12314/12428/12313/268697/12448/13555/12649/19094/12530/19047/50883/104394/17126/22059/19650/16440/11651/18787/22334/21812/21803/242705/26395/11739/12567/17535/17127/19744/18033/21813/22335/12442/26417/17164/12333/73181/16653/15461/19360/19045/12579/23797/12575/21809/12315/29857/19058/23871
mmu04820	mmu04820	Cytoskeleton in muscle cells	125	0.386251820166388	1.81847561591305	2.971373e-05	2.748520e-04	1.711580e-04	1535	tags=54%, list=34%, signal=37%	11717/326618/16416/16412/24051/12826/68794/20969/13003/59069/12827/16400/22004/16403/13511/11933/16402/12825/16398/12842/22003/12834/12832/16410/12831/192897/13346/12833/109620/53867/67451/13405/98932/104099/16480/12843/12835/11468/11603/17886/109700/14268/16905/21827/13506/20740/54418/27222/13807/16404/21956/22793/94216/16773/24052/109674/21826/13138/77579/232975/22330/15530/21825/12814/13726/11…
mmu05100	mmu05100	Bacterial invasion of epithelial cells	58	0.429979961414452	1.79389538490196	9.100922e-04	5.136622e-03	3.198718e-03	1661	tags=66%, list=37%, signal=42%	71890/67771/11867/76709/12540/13043/56378/16412/19353/12385/12390/11848/20416/16402/14083/12391/67300/13430/20779/56443/12550/14268/68089/216148/12389/16202/83767/271849/242687/22330/12928/12757/11465/11461/74192/12927/330662/12387
mmu03020	mmu03020	RNA polymerase	26	0.509021879901453	1.78607434292578	2.900079e-03	1.270693e-02	7.912958e-03	1980	tags=77%, list=44%, signal=43%	245841/69833/69241/74414/67710/66420/20018/20016/20019/20022/70428/64424/20017/69920/66491/67005/218832/78929/67486/67065
mmu05205	mmu05205	Proteoglycans in cancer	179	0.363269836872564	1.77541206838958	1.448041e-05	1.461205e-04	9.099331e-05	2038	tags=61%, list=45%, signal=35%	108058/66922/20104/12540/18176/16416/13043/16412/26415/20130/19353/20848/20969/12390/11848/216795/22421/29875/17698/16402/19094/14368/192176/19047/16398/13039/12842/12323/16410/12512/17126/22059/19878/14083/21898/12391/14365/17395/16440/11651/18793/12843/21803/26395/22418/14784/20779/12367/57265/26417/14268/18479/93735/16653/15461/74055/18792/12389/19045/16801/15234/12505/22417/14173/23797/12575/…
mmu05203	mmu05203	Viral carcinogenesis	140	0.372493758929337	1.77488025599507	3.246209e-05	2.921588e-04	1.819355e-04	1449	tags=47%, list=32%, signal=33%	12540/18176/22629/12566/12534/12447/22630/19353/20848/12028/12428/11848/109711/12448/15387/12649/54401/235459/12370/22059/27401/13194/19650/20259/19179/107995/12567/18746/16453/14784/78284/20779/12367/22030/18033/22335/26417/17164/74197/12266/237336/18034/16653/17120/15461/17000/22627/19664/16151/22628/18970/60595/12579/12575/26427/242341/12913/17096/14885/433759/229906/16451/15007/15182/68153/12…
mmu05161	mmu05161	Hepatitis B	144	0.367209772062545	1.75594578428872	5.282335e-05	4.510301e-04	2.808691e-04	1828	tags=56%, list=41%, signal=34%	18538/18176/12566/26415/12447/22630/13557/20848/12028/11799/12428/12448/16150/13555/54401/19094/17874/11783/12370/117149/22059/21898/13194/68652/17395/11651/26401/21812/21803/242705/26395/16453/14784/78284/20779/12367/17127/18033/21813/22335/26417/142980/26398/73181/56480/17128/16653/15975/15461/16151/266632/23797/12575/26427/12913/21809/29857/16451/12015/15530/24088/56489/231991/228607/66513/208…
mmu05206	mmu05206	MicroRNAs in cancer	127	0.372276028267438	1.75541204560017	1.592660e-04	1.082359e-03	6.740153e-04	1485	tags=46%, list=33%, signal=32%	12189/18176/16416/12447/13557/20848/13078/22196/11848/13433/13640/12448/16150/15387/20416/13555/16765/16402/12530/12532/216456/22003/13436/18595/18596/12531/22059/18131/23939/14365/21923/17395/14660/242705/26395/14784/13639/12367/18033/26417/17250/16653/15461/20724/18792/12505/12575/271849/18803/17118/18590/22350/433759/13649/15182/12928/21825/13637/18132
mmu04130	mmu04130	SNARE interactions in vesicular transport	31	0.472526307777228	1.73190427003071	5.906523e-03	2.092417e-02	1.303007e-02	1393	tags=55%, list=31%, signal=38%	56418/71116/53331/55943/20907/22319/56494/13852/58244/67023/74732/56216/20333/53612/20909/53334/224630
mmu04510	mmu04510	Focal adhesion	186	0.3484623329038	1.71031253006792	1.052536e-04	7.788765e-04	4.850282e-04	1663	tags=53%, list=37%, signal=35%	12334/20750/12540/16416/16412/16782/19353/12826/12390/67268/11848/12827/109711/16400/16780/16403/20416/16402/22323/192176/19047/16398/12842/12834/224105/16410/18595/18596/11797/192897/19878/12833/14083/12391/98932/104099/226519/18720/21923/11651/57342/22341/12843/12835/18654/215449/26395/170736/16777/14784/20779/228785/109700/11796/26417/14268/21827/18481/18479/15461/170758/107589/216148/12389/19…
mmu04512	mmu04512	ECM-receptor interaction	75	0.391612342560854	1.70471140312837	1.443970e-03	7.632412e-03	4.752916e-03	1469	tags=53%, list=33%, signal=36%	20750/16416/16412/16782/12826/20969/12827/16400/16780/16403/16402/16398/12842/12834/16410/192897/12833/15366/104099/226519/21923/12843/12835/16777/11603/109700/14268/21827/16404/12505/94216/16773/16779/16776/21826/16775/13138/16423/15530/21825
mmu04666	mmu04666	Fc gamma R-mediated phagocytosis	84	0.383531239262637	1.70346252586886	1.148265e-03	6.268399e-03	3.903508e-03	1621	tags=55%, list=36%, signal=36%	67771/11867/76709/12540/56378/19353/12631/18783/22323/18720/20259/13196/11651/26395/13430/56443/18806/16885/26417/16886/18479/14389/68089/17357/20698/11845/83767/23797/18753/17969/17096/242687/18803/17118/22325/16331/14129/57257/12928/227753/74192/218038/211914/22324/12632/330662
mmu05133	mmu05133	Pertussis	66	0.398983686924301	1.70188152759771	2.110694e-03	1.009688e-02	6.287607e-03	1881	tags=61%, list=42%, signal=36%	70405/16412/26415/12314/11848/12313/12631/16402/16409/19094/17874/117149/21898/12475/14679/14678/66824/12367/12369/18033/20311/26417/17087/12266/266632/216799/12315/29857/83430/16414/12632/12259/12262/12260/12258/12269/19697/16193/50908/107607
mmu04810	mmu04810	Regulation of actin cytoskeleton	211	0.341186132902571	1.69369744288497	2.554825e-05	2.430734e-04	1.513686e-04	1621	tags=52%, list=36%, signal=35%	67771/66922/11867/76709/14062/12540/18176/16416/56378/16412/14745/20130/19353/226970/67268/11848/109711/16400/12631/14172/16403/20430/404710/29875/17698/16402/16409/18643/19047/16398/224105/16410/18595/18596/192897/19878/14083/30938/98932/104099/18720/20259/237860/101314/11651/19241/26395/14178/245857/20779/56443/228785/17886/109700/16885/26417/18645/14268/216963/18481/16886/18479/231637/68089/16…
mmu04144	mmu04144	Endocytosis	176	0.344578251556597	1.68198313791819	6.743088e-05	5.476704e-04	3.410497e-04	1725	tags=52%, list=38%, signal=33%	67771/11867/76709/12540/11773/75608/68942/56378/22088/68953/70160/12390/12765/11848/54673/98878/18571/11840/70527/100017/259300/13855/14773/17999/18759/20405/66371/232910/18595/17126/53869/12391/71770/18720/75788/13196/56324/67300/21812/66201/13430/106572/83814/20779/56443/17127/66700/21813/93737/107305/18806/140500/234353/216963/22365/68089/71889/15461/19326/12389/26385/78618/11845/20479/15239/2…
mmu05167	mmu05167	Kaposi sarcoma-associated herpesvirus infection	167	0.345611594448626	1.6779395050177	1.288087e-04	9.126232e-04	5.683160e-04	2156	tags=65%, list=48%, signal=35%	70405/18176/12768/26415/13557/19353/20848/12028/78294/12314/21937/15979/12313/14688/16150/13555/19094/14710/12370/330122/22059/14707/14693/16440/11651/242705/26395/12567/20779/12367/22030/18033/15894/26417/17164/142980/66066/225326/26398/73181/14696/12266/56480/16653/15975/15461/16151/15976/14702/14173/23797/12575/21415/17096/18803/12315/29857/19058/16451/15007/14697/56489/56208/64337/16391/14102…
mmu04668	mmu04668	TNF signaling pathway	103	0.365756399055191	1.67584115926175	2.117936e-03	1.009688e-02	6.287607e-03	2177	tags=70%, list=48%, signal=37%	26415/56532/21937/16150/19094/12370/330122/11797/20297/68652/12977/13614/17395/11651/22341/26395/17387/78284/56613/12367/22030/12369/12702/18033/15894/11796/20311/26417/26398/16151/16878/23797/26410/26427/12913/11491/20296/16182/29857/20312/16449/231991/26408/66513/14102/11798/71609/20310/20293/21938/22031/19766/26400/22329/19697/16193/26409/22033/18707/21926/74006/12981/18708/19225/26397/14082/2…
mmu04115	mmu04115	p53 signaling pathway	65	0.392316119118401	1.66833844613289	3.178714e-03	1.357067e-02	8.450833e-03	903	tags=35%, list=20%, signal=29%	20135/12566/29870/12534/12447/12028/268697/12448/12649/67874/50883/11783/12370/22059/53892/12048/21933/18787/12567/55948/64058/12367/12442
mmu04613	mmu04613	Neutrophil extracellular trap formation	82	0.371460982936545	1.64371799754994	3.558719e-03	1.463029e-02	9.110690e-03	2070	tags=68%, list=46%, signal=37%	14161/99571/16416/110135/26415/19353/14293/12946/16409/19094/21898/74244/14289/11651/12273/22334/26395/11739/18798/20779/15289/18033/22335/26417/12363/12266/15078/20344/23797/17969/18803/29857/433759/15182/14129/24088/11465/11461/18797/50701/17970/16414/170743/234779/170744/17972/19697/26409/22371/19354/18707/18708/20345/12362/18750/20963
mmu05417	mmu05417	Lipid and atherosclerosis	177	0.336200703156316	1.64110261716162	1.644161e-04	1.095011e-03	6.818940e-04	1825	tags=51%, list=41%, signal=31%	108058/70405/12540/18176/26415/19353/20848/12028/12314/21937/11848/12313/16150/19094/17874/11783/12323/108078/12370/330122/117149/22059/19878/14083/21898/68652/12475/12048/17395/21933/11651/215449/18798/66824/16803/20779/12367/21353/22030/12369/11303/18033/15894/26417/18127/17087/26398/56480/16653/15461/21899/16151/16801/266632/20344/12368/23797/17969/17096/18803/216799/20296/12315/12325/29857/22…
mmu03018	mmu03018	RNA degradation	53	0.398625715777686	1.6348586781048	7.368040e-03	2.453557e-02	1.527899e-02	1246	tags=47%, list=28%, signal=34%	76522/69639/66373/67678/66583/66094/50911/56421/67207/24128/227715/78651/27756/68533/66446/74108/72068/104625/66317/72662/69125/13807/232791/50912/78893
mmu04151	mmu04151	PI3K-Akt signaling pathway	300	0.317772212913645	1.62221043589948	2.123961e-05	2.080232e-04	1.295419e-04	1474	tags=42%, list=33%, signal=30%	13685/20750/12189/20104/14062/18176/22629/16416/12566/16412/14745/26931/12447/22630/16782/19353/12826/12827/19053/16400/16780/21802/14172/13640/105787/14688/16403/12448/18414/16150/26987/73699/13874/16402/54401/14710/16398/12842/12834/16410/18595/18596/192897/22059/12985/12833/14707/14083/21898/104099/226519/12977/21923/12048/14693/11651/22341/12843/12835/18654/26395/14178/74551/12986/12567/16453…
mmu05212	mmu05212	Pancreatic cancer	74	0.373393620498897	1.62199562734876	5.350704e-03	1.936722e-02	1.206051e-02	1449	tags=50%, list=32%, signal=34%	19361/12540/13557/19353/20848/12028/21802/16150/13555/17126/22059/64143/12048/11651/21812/21803/242705/26395/12567/19765/17127/12190/18033/21813/18806/26417/56044/17128/16653/170758/16151/23797/12575/21809/13649/16451/12015
mmu05135	mmu05135	Yersinia infection	120	0.34626367336672	1.62190055156116	2.633311e-03	1.201223e-02	7.480351e-03	2054	tags=62%, list=46%, signal=34%	67771/11867/76709/12540/56378/16412/26415/19353/11848/16150/16402/19094/17874/19878/14083/21898/68652/18720/11651/26395/66824/20779/56443/22030/110651/18033/16885/26417/14268/54483/26398/56480/68089/170758/16151/16801/266632/11845/23797/20111/242687/18803/216799/20296/29857/22325/57257/12928/26431/11465/11461/74192/66513/22324/12927/330662/20293/18018/26400/16822/19697/16193/26409/22376/67071/193…
mmu04064	mmu04064	NF-kappa B signaling pathway	92	0.357402365428127	1.61155567757195	4.741477e-03	1.794218e-02	1.117310e-02	2132	tags=63%, list=47%, signal=34%	21937/22196/16150/17874/16177/245527/330122/11797/117149/21898/68652/12475/13607/12048/13000/16803/22030/18033/15894/11796/17087/18034/17000/18792/16151/266632/17096/18803/19698/24099/57913/66513/12042/11798/71609/20310/21939/12229/234779/22031/19766/22329/19697/50930/26409/17060/18829/22033/11545/21926/13197/21934/19225/20963/22029/18035/59004/14825
mmu05220	mmu05220	Chronic myeloid leukemia	74	0.370894473580349	1.61113950889508	6.048622e-03	2.098739e-02	1.306944e-02	1461	tags=49%, list=33%, signal=33%	18176/13017/13557/12028/16150/20416/13555/22059/12048/11651/21812/21803/242705/26395/12567/14784/17127/18033/21813/26417/14389/17128/16653/15461/216148/16151/12394/23797/12575/271849/21809/433759/19247/15182/12015/12928
mmu03015	mmu03015	mRNA surveillance pathway	29	0.445145848954173	1.60779026844956	1.487518e-02	4.307334e-02	2.682298e-02	1545	tags=59%, list=34%, signal=39%	26931/19053/73699/17149/66441/19047/53817/21681/51792/52432/19045/60365/71978/21770/192170/225849/56522
mmu04621	mmu04621	NOD-like receptor signaling pathway	110	0.346905442655957	1.60477081684337	3.992459e-03	1.582725e-02	9.856070e-03	2054	tags=63%, list=46%, signal=35%	26415/56532/11848/16150/19094/17874/12370/330122/11797/67955/21898/68652/12048/16440/22334/13030/18798/66824/21353/22030/18033/192656/22335/11796/26417/195046/12363/54483/56480/15975/22627/16151/18036/332579/15976/266632/18753/216799/20296/29857/16451/56489/228607/66513/18797/16391/56486/54721/11798/19200/20310/20293/22031/19766/19697/16193/26409/17948/20847/107607/22033/21926/74006/22051/383619/…
mmu04625	mmu04625	C-type lectin receptor signaling pathway	87	0.357966332620831	1.60000225918231	5.445264e-03	1.949756e-02	1.214167e-02	2177	tags=64%, list=48%, signal=34%	70405/66922/18176/26415/20130/12314/11848/12313/16150/19094/12370/16440/11651/66824/20779/18033/26417/17164/73181/18479/18034/16653/15461/16151/332579/23797/18753/216799/12315/29857/208650/19058/19698/83430/19247/56489/12042/16391/14127/18018/234779/19697/16193/20847/18707/21926/18708/19225/12362/26420/20295/20963/19056/18035/18710/26419
mmu04210	mmu04210	Apoptosis	114	0.34397447514025	1.59903832305818	3.757737e-03	1.526008e-02	9.502877e-03	2054	tags=61%, list=46%, signal=34%	12334/18176/22143/11546/13033/22142/12028/21937/11799/16150/13039/11783/12370/11797/22059/12048/21933/16440/11651/13032/13030/26395/13368/12367/22030/16188/12369/13163/18033/11796/26417/12333/16905/13038/20740/16653/15461/16151/235587/18049/22146/12368/23797/64138/12015/26408/11465/11461/57913/53857/13040/14102/170770/11798/71609/328417/238463/13347/19766/19697/12984/11545/18707/21926/13197/22944…
mmu04933	mmu04933	AGE-RAGE signaling pathway in diabetic complications	94	0.351271041622317	1.59083642270869	5.063576e-03	1.873523e-02	1.166695e-02	1340	tags=46%, list=30%, signal=33%	12540/18176/26415/19353/12826/20848/12028/18799/12827/19094/12825/12842/17126/13614/11651/18787/22341/21812/12843/21803/18798/12567/12367/17127/18033/21813/15894/26417/18127/14268/21824/17128/16653/15461/74055/94216/14066/23797/18753/21809/18803/20296/29857
mmu04670	mmu04670	Leukocyte transendothelial migration	106	0.343241226119959	1.5795913143171	5.003892e-03	1.872243e-02	1.165898e-02	1975	tags=59%, list=44%, signal=34%	12540/16412/26415/19353/12385/67268/11848/56173/109711/16456/53624/18613/17698/67374/16409/19094/22323/60363/12737/19878/14083/12739/71908/98932/14679/17395/14678/215449/15894/18417/60595/12740/17969/18803/67938/29857/22325/22350/19247/57257/22330/20469/11465/11461/17970/56508/22324/12927/16414/21838/54419/12387/17906/234779/17972/22329/17390/19303/19354/18707/12388/109905/12562
mmu04914	mmu04914	Progesterone-mediated oocyte maturation	81	0.357190900091869	1.57820084320954	6.316031e-03	2.146162e-02	1.336475e-02	1536	tags=49%, list=34%, signal=33%	71890/56150/12566/26415/12534/268930/12235/12428/268697/52206/20878/18817/19094/12530/12532/12531/14679/56317/11651/56371/14678/26395/66156/68999/110651/12442/26417/18576/59008/16653/17120/23797/20111/18667/104111/29857/217232/210044/52563/99152
mmu05214	mmu05214	Glioma	68	0.367126583091909	1.5750747594754	1.004673e-02	3.166734e-02	1.972014e-02	1382	tags=46%, list=31%, signal=32%	108058/70405/18176/13557/12028/12314/12313/21802/20416/13555/12323/18595/18596/22059/11651/242705/26395/12567/14784/26417/16653/15461/216148/23797/12575/271849/18803/12315/12325/18590/13649
mmu05160	mmu05160	Hepatitis C	126	0.333693884222959	1.57129359459784	3.932277e-03	1.577649e-02	9.824460e-03	1934	tags=55%, list=43%, signal=32%	18176/22629/12566/22630/13557/20848/12028/21937/56173/19053/53624/16150/13555/73699/54401/11783/12370/60363/12737/22059/12739/71908/11651/242705/26395/12567/14784/12367/22030/12702/18033/51792/18417/26417/52432/142980/56480/16653/15975/15461/22627/16151/22628/15976/71978/12740/23797/12575/13649/16451/12015/56489/228607/16391/14102/19192/54419/54721/71609/12387/22031/19766/19697/19645/17869/20847/…
mmu04371	mmu04371	Apelin signaling pathway	118	0.336119909870276	1.57004696814319	4.514424e-03	1.748027e-02	1.088545e-02	1967	tags=58%, list=44%, signal=33%	20750/70405/66922/20104/18176/20130/12314/11475/12313/105787/14688/19079/14710/17126/14707/18131/14679/18791/14693/16440/11651/18787/21812/14678/26395/18798/17127/108097/228785/26417/12550/18127/18181/66066/18576/225326/14696/17128/16653/15461/107589/20698/14702/23797/12315/108099/104111/16449/14697/210044/56208/64337/20544/110891/18797/14709/17906/11514/19082/11513/320207/30955/14704/17897/14674…
mmu04722	mmu04722	Neurotrophin signaling pathway	115	0.337215603652862	1.57000760177896	4.637297e-03	1.774965e-02	1.105321e-02	1461	tags=43%, list=33%, signal=30%	108058/70405/12540/18176/26415/19353/12028/12314/11848/12313/16150/20416/73914/19094/72843/12323/192662/22059/23939/11651/26401/215449/26395/14784/110651/18033/192656/26417/17164/78405/16653/15461/22627/216148/18036/18049/266632/23797/271849/18753/11857/20111/18803/12315/12325/29857/23921/19247/12015/12928
mmu04217	mmu04217	Necroptosis	99	0.343999850810035	1.56729067520482	6.050420e-03	2.098739e-02	1.306944e-02	2054	tags=58%, list=46%, signal=32%	108058/12334/75608/68942/68953/20848/56532/12028/21937/15979/77125/15980/18783/66371/12323/12370/11797/21898/21933/22334/11739/16453/66824/22030/15289/66700/22335/11796/12333/110078/142980/15975/15976/216799/12325/20479/208092/16451/116733/20852/16391/14102/54721/11798/71609/16452/19766/14319/20847/22033/11545/14661/21926/74006/12362/14082/26420
mmu05170	mmu05170	Human immunodeficiency virus 1 infection	182	0.320143672686566	1.56683805825768	8.573663e-04	4.922465e-03	3.065357e-03	2177	tags=62%, list=48%, signal=33%	70405/18176/26415/12534/108012/19353/12028/12314/21937/12313/11769/268697/12631/14688/16150/12649/19094/17874/12532/14710/224105/12370/56438/14707/14083/21898/13194/68652/14679/12048/11767/14693/16440/11651/14678/26395/12367/22030/18033/12442/16885/26417/18481/66066/16886/73181/18479/14696/56480/16653/11768/15461/170758/16151/266632/14702/214230/23797/18803/26965/12315/14681/29857/72584/19058/993…
mmu04728	mmu04728	Dopaminergic synapse	113	0.335866739218846	1.5597162959668	6.194690e-03	2.126631e-02	1.324313e-02	1628	tags=44%, list=36%, signal=29%	108058/70405/17161/26415/26931/12314/19053/12313/14688/73699/19094/19047/14710/12323/14707/14679/12288/14693/16440/11651/14678/18798/78284/51792/52432/66066/14696/19045/13491/11865/14702/71978/21770/23797/26427/12913/12315/14802/12325/14681/29857/606496/225849/14697/216869/231991/64337/18797/12286/14709
mmu04390	mmu04390	Hippo signaling pathway	123	0.331495083299284	1.55770973437587	5.245328e-03	1.919444e-02	1.195292e-02	1284	tags=41%, list=29%, signal=30%	22629/22630/12385/11799/19053/216795/22421/73699/54401/12161/14368/19047/18759/17126/11797/14365/18787/21812/21803/104318/16897/17125/22418/93960/217325/17127/57265/21813/51792/20583/93737/11796/27373/12550/52432/12166/93735/17128/56274/12159/22627/22628/19045/15901/71978/22417/21415/242316/21809/22422/11839
mmu04360	mmu04360	Axon guidance	168	0.319922866590022	1.5540965842024	2.122466e-03	1.009688e-02	6.287607e-03	1923	tags=55%, list=43%, signal=33%	108058/12540/18176/20361/16412/11854/20130/19353/20346/67268/11848/12631/13640/20350/224105/20564/12323/20359/19878/14083/20348/98932/14679/14365/237860/13641/13844/117600/14678/20352/22418/245857/13639/20779/18844/65254/93737/17974/16885/26417/18481/13846/16886/73181/18479/231637/16653/19876/15461/170758/14159/13837/16202/20349/14270/18186/22417/214230/13848/18803/67938/20358/107448/18209/12325/…
mmu04350	mmu04350	TGF-beta signaling pathway	82	0.348575766953271	1.54245072287644	9.642980e-03	3.087608e-02	1.922740e-02	2019	tags=62%, list=45%, signal=35%	11848/21781/19053/73699/12161/104394/17126/56438/19650/17130/75788/15903/21812/21803/11477/17125/17129/17127/21813/51792/26417/55994/16323/12166/17128/12159/14313/15901/12579/242316/21809/26965/433759/12167/268977/15182/20466/21825/218441/13590/13179/17869/18007/16326/19052/21926/11479/20683/12156/72508/21808
mmu04540	mmu04540	Gap junction	81	0.346835884979144	1.53244857578574	1.079467e-02	3.297822e-02	2.053646e-02	1783	tags=54%, list=40%, signal=33%	18176/22143/22154/14745/12534/22142/22151/22152/73710/18595/18596/23939/14679/21872/16440/104318/14678/26395/67951/18798/14784/20779/26417/14609/16653/15461/22146/19092/22153/104111/18590/13649/15559/210044/227613/53857/18797/14816/14672/11514/238463/11513/18591/19091
mmu05163	mmu05163	Human cytomegalovirus infection	206	0.309168315022992	1.53225091376178	2.108551e-03	1.009688e-02	6.287607e-03	2158	tags=59%, list=48%, signal=32%	13685/70405/18176/16416/12768/26415/13557/19353/20848/12028/12314/21937/12765/11848/12313/14688/16150/13555/19094/16177/14710/16410/18595/12370/22059/19878/14707/14083/14679/14693/16440/11651/242705/14678/26395/18798/12567/14784/78284/20779/12367/22030/19744/18033/26417/66066/73181/14696/56480/16653/15461/170758/16151/19219/16801/14702/23797/12575/26427/19217/12913/20296/12315/104111/14681/29857/…
mmu05169	mmu05169	Epstein-Barr virus infection	171	0.31447291610528	1.53031822318021	2.863810e-03	1.270693e-02	7.912958e-03	2160	tags=63%, list=48%, signal=34%	12566/26415/12447/13557/19353/20848/12028/12428/12495/21762/57296/12448/16150/13555/19094/17874/17999/11783/12370/22059/27401/68652/11651/215446/19185/19184/19179/242705/12567/16453/23997/12367/22030/17463/18033/19182/15894/26398/18034/56480/15975/19664/16151/59029/18036/15976/266632/12505/69077/23797/12575/17096/29857/433759/70247/19698/16451/15007/15182/24088/20466/56489/228607/66513/66997/1639…
mmu01524	mmu01524	Platinum drug resistance	60	0.364562834697474	1.52946090487339	1.707172e-02	4.858876e-02	3.025758e-02	1687	tags=50%, list=38%, signal=32%	12189/14873/56615/12028/14857/11799/14866/11783/12370/11797/22059/17685/12048/11651/13870/12367/11796/26417/17350/17688/23797/12575/66447/12015/26408/14102/170770/11798/13866/14870
mmu05166	mmu05166	Human T-cell leukemia virus 1 infection	195	0.309668388285728	1.52594322186024	1.539495e-03	7.967673e-03	4.961693e-03	2110	tags=58%, list=47%, signal=32%	18176/56150/12566/12447/13557/12257/12028/21937/12428/12236/12448/16150/13555/52206/12649/12237/16177/50883/105988/17126/22059/56317/12048/16178/11651/26401/22334/21812/21803/242705/107995/26395/66156/11739/12567/16453/78284/68999/17127/17393/18033/21813/110196/15894/22335/20525/12442/26417/26398/73181/59008/237336/18034/17128/16653/17120/15461/17000/12580/16151/18970/18186/12579/23797/12575/2642…
mmu04148	mmu04148	Efferocytosis	94	0.333999770233463	1.51261828248005	1.192753e-02	3.572105e-02	2.224450e-02	1698	tags=50%, list=38%, signal=32%	108058/16416/26415/19128/19353/18613/11846/19094/12323/16410/14083/11487/11689/11863/16971/21803/26395/235584/12367/12369/11303/20525/26417/17164/73181/20698/78070/19219/19217/11491/12325/29857/12642/19247/233571/20312/16423/192654/12928/21825/12927/330662/15251/12259/16452/18018/12262
mmu05034	mmu05034	Alcoholism	86	0.338740516095795	1.51044023979999	1.446140e-02	4.224251e-02	2.630559e-02	1534	tags=45%, list=34%, signal=30%	70405/18176/17161/12314/11541/12313/14688/20416/19047/14710/55984/14707/207565/14679/14693/14814/14678/26395/14784/78284/26417/66066/14696/16653/15461/216148/19045/15078/14702/271849/26427/12913/12315/14681/433759/15182/14697/231991/64337
mmu04062	mmu04062	Chemokine signaling pathway	175	0.308860123856505	1.50684954973073	3.494282e-03	1.454495e-02	9.057547e-03	1964	tags=55%, list=44%, signal=32%	12540/18176/12768/19353/20848/12765/11848/14688/16150/20416/14773/14710/56744/330122/19878/14707/14083/20297/14679/14693/11651/20308/14678/215449/26395/18798/16453/14784/20779/18033/20305/20311/26417/66066/56221/18479/14696/16653/15461/170758/216148/20306/16151/18036/26385/14702/23797/271849/18753/14191/17969/17096/18803/20296/104111/22325/606496/20312/21844/66102/57257/12015/12928/14697/216869/2…
mmu05145	mmu05145	Toxoplasmosis	95	0.330443301412783	1.49797145711053	1.417961e-02	4.178593e-02	2.602127e-02	1842	tags=56%, list=41%, signal=34%	16412/26415/16782/20848/21937/15979/16780/16403/16150/15980/19094/17874/12370/11797/21898/68652/14679/226519/12048/11689/11651/21803/14678/16777/12367/18033/11796/26417/17087/16151/18036/266632/16773/16779/23797/16776/21809/14681/29857/16775/16451/12015/24088/66513/54721/11798/16452/21939/12774/19697/26409/320207/30955
mmu04620	mmu04620	Toll-like receptor signaling pathway	93	0.330786141200504	1.49429057086013	1.567964e-02	4.501138e-02	2.802984e-02	2054	tags=58%, list=46%, signal=32%	20750/26415/19353/16150/19094/17874/12370/117149/21898/68652/12475/11651/26395/16803/18033/26417/53791/142980/17087/26398/13038/56480/15975/21899/16151/15976/266632/23797/26410/29857/16451/24088/56489/66513/16391/54721/170743/21939/21897/170744/22031/19766/26400/19697/16193/26409/20847/12519/18707/21926/18708/26397/14082/26420
mmu05168	mmu05168	Herpes simplex virus 1 infection	131	0.315649933095794	1.49351880413125	8.358663e-03	2.728858e-02	1.699336e-02	2070	tags=56%, list=46%, signal=31%	13685/16416/12028/21937/15979/16150/15980/16402/17874/19047/11783/12370/21681/11797/22059/68652/12048/11651/20779/12367/22030/19744/12702/13163/18033/11796/142980/12266/56480/15975/20383/16151/19045/332579/15976/266632/23797/20296/19247/16451/15007/18854/12015/24088/108014/56489/228607/66513/16391/14102/54721/71609/16452/20293/21356/15006/22031/19697/50930/16193/71586/26409/15013/20847/22033/1870…
mmu05418	mmu05418	Fluid shear stress and atherosclerosis	119	0.318111959492945	1.48790929750844	1.011545e-02	3.166734e-02	1.972014e-02	1825	tags=55%, list=41%, signal=34%	70405/14873/16416/26415/56615/19353/14857/20969/12314/21937/12390/11848/14866/12313/105787/16150/18613/19094/16177/13039/16410/22059/14083/12391/23939/13614/18791/17395/16178/11651/11477/20779/18033/15894/18127/26398/21824/12166/12159/170758/16151/12389/23797/17969/20296/12315/66447/18590/29857/12167/16800/26408/11465/11461/17970/12387/20293/14870/18591/26400/15368/22329/17390/19697/211666/26409
mmu05200	mmu05200	Pathways in cancer	479	0.279143862659754	1.46140637940053	2.635536e-04	1.603809e-03	9.987371e-04	2026	tags=52%, list=45%, signal=32%	108058/70405/19361/14062/14873/12540/18176/54124/12566/16412/14745/12447/13017/56615/13557/218772/16782/19353/12826/20848/12385/12028/14857/12314/15979/11799/12428/59069/11848/12827/14866/16400/12313/16780/21802/14172/14688/16403/12448/16150/13555/216795/22421/15980/14368/14710/16398/11783/12323/16410/14634/18595/12370/18596/17126/56438/11797/72993/22059/19878/27412/27401/14707/14083/64143/18131/…
mmu05225	mmu05225	Hepatocellular carcinoma	136	0.307307617596219	1.46028797092714	1.201429e-02	3.572105e-02	2.224450e-02	2161	tags=60%, list=48%, signal=32%	14873/18176/56615/13557/12028/14857/14866/21802/20416/13555/216795/22421/14368/17126/22059/27412/14365/12048/11651/21812/21803/242705/93687/26395/12567/22418/14784/17127/57265/21813/26417/93735/17128/16653/15461/216148/15234/22417/23797/12575/271849/21415/21809/22422/18803/66447/50493/13649/12015/12006/11465/11461/22413/16973/13543/12387/14870/21414/234779/15368/211666/19645/13712/17869/21416/143…
mmu05165	mmu05165	Human papillomavirus infection	284	0.285928283185602	1.45329015576729	2.976190e-03	1.287106e-02	8.015168e-03	2059	tags=55%, list=46%, signal=32%	13685/20750/12540/18176/16416/12566/16412/26931/12447/16782/12826/12028/21937/12428/12827/19053/16400/16780/16403/12448/16150/13555/216795/22421/73699/16402/14368/18759/16398/12842/12834/16410/12370/18596/192897/22059/12833/14083/19650/18131/104099/226519/14365/21923/11651/12843/12835/19179/93687/26395/16897/12567/18746/22418/16777/14784/78284/217325/12367/19744/57265/18033/51792/109700/93737/264…
mmu04260	mmu04260	Cardiac muscle contraction	76	-0.272074	-1.53495	1.017539e-02	3.166734e-02	1.972014e-02	1044	tags=43%, list=23%, signal=34%	54377/12861/11937/12867/12859/12858/11928/66576/66594/12857/66142/22272/12864/12866/11931/11936/12292/53313/66694/12868/66445/67003/17888/20191/236794/20541/21924/140781/12298/56808/12865/22273/12862
mmu00140	mmu00140	Steroid hormone biosynthesis	52	-0.308789	-1.60052	1.095101e-02	3.315169e-02	2.064449e-02	439	tags=25%, list=10%, signal=23%	13076/72094/105349/394432/112417/15486/100559/13106/94224/208665/13123/15494/394435
mmu00310	mmu00310	Lysine degradation	36	-0.360479	-1.69209	1.072652e-02	3.297822e-02	2.053646e-02	477	tags=31%, list=11%, signal=28%	93747/78920/11671/110446/15107/19193/23923/11669/270076/56752/110695
mmu04932	mmu04932	Non-alcoholic fatty liver disease	138	-0.272564	-1.7047	1.976396e-04	1.265654e-03	7.881581e-04	923	tags=39%, list=21%, signal=32%	72900/12858/241113/66576/13063/384783/407785/75406/66594/68342/18706/67130/12857/14103/66142/20181/22272/13198/68349/54405/68465/12864/12866/16367/226646/17992/227197/108079/22259/68194/66694/12868/16334/66445/67003/66218/66046/26416/70316/66377/66945/66052/26414/66108/225887/68198/67273/67680/12865/22273/78330/17995/13106/12862
mmu05330	mmu05330	Allograft rejection	33	-0.371463	-1.70744	9.437588e-03	3.051181e-02	1.900056e-02	1168	tags=58%, list=26%, signal=43%	16159/16183/14990/667977/14939/14961/15001/14969/14960/14103/15018/21947/16191/15978/15002/12487/15040/16160/18646
mmu00600	mmu00600	Sphingolipid metabolism	42	-0.357057	-1.74166	4.120721e-03	1.614353e-02	1.005303e-02	504	tags=36%, list=11%, signal=32%	14667/74442/54447/14420/268656/20597/22239/18010/12091/56336/15212/70059/81535/20598/23956
mmu00010	mmu00010	Glycolysis / Gluconeogenesis	53	-0.335107	-1.7439	2.208599e-03	1.035864e-02	6.450615e-03	781	tags=38%, list=17%, signal=32%	66681/230163/13382/68738/11529/21991/11532/56012/11522/11671/68263/58810/18642/319625/11676/11669/56752/110695/14121/60525
mmu01212	mmu01212	Fatty acid metabolism	40	-0.365652	-1.7597	3.389954e-03	1.428930e-02	8.898347e-03	645	tags=35%, list=14%, signal=30%	231086/54397/93747/20249/11364/12895/66885/113868/20280/110446/15107/11409/80911/56473
mmu05415	mmu05415	Diabetic cardiomyopathy	171	-0.276504	-1.77539	5.720218e-06	6.568389e-05	4.090320e-05	1042	tags=43%, list=23%, signal=35%	12861/11937/12867/12491/12859/68375/595136/11607/72900/228033/12858/18597/66576/18795/407785/11951/75406/66594/68342/11957/18706/67130/12857/67126/66142/22272/68349/54405/12864/13057/12866/16367/226646/71679/17992/227197/68194/53313/66694/12868/16334/66445/67003/66218/66046/22333/20191/26416/66043/70316/11949/66377/66945/66052/56717/12895/26414/66108/225887/68198/11946/67273/68263/67680/12865/222…
mmu05208	mmu05208	Chemical carcinogenesis - reactive oxygen species	177	-0.278446	-1.80161	2.031971e-06	2.819360e-05	1.755695e-05	923	tags=40%, list=21%, signal=33%	72900/228033/12858/66576/13077/407785/11951/20662/75406/66594/68342/11957/18706/67130/12857/67126/110157/109880/20663/66142/22272/68349/54405/12864/13057/12866/226646/71679/17992/227197/68194/66694/12868/66445/67003/66218/66046/22333/13076/26416/68214/66043/70316/11949/66377/66945/66052/26414/66108/14872/225887/22339/68198/11946/67273/67680/12865/58810/12359/22273/13107/78330/17995/13106/20655/13…
mmu00120	mmu00120	Primary bile acid biosynthesis	16	-0.507408	-1.85377	6.964809e-03	2.342709e-02	1.458870e-02	433	tags=50%, list=10%, signal=45%	26459/13124/104086/93732/20280/208665/13123/17117
mmu00430	mmu00430	Taurine and hypotaurine metabolism	15	-0.527983	-1.88904	7.518797e-03	2.478970e-02	1.543724e-02	852	tags=60%, list=19%, signal=49%	12583/14417/14261/14415/55990/14262/246277/14263/14598
mmu04714	mmu04714	Thermogenesis	162	-0.298158	-1.8981	1.408411e-06	2.131822e-05	1.327545e-05	923	tags=43%, list=21%, signal=35%	12859/68375/595136/57423/72900/228033/12858/241113/66576/27425/271639/407785/11951/20662/75406/66594/68342/11957/67130/432530/12857/67126/20663/66142/22272/68349/54405/12864/208647/12866/12163/14683/11515/11958/226646/71679/17992/227197/108079/68194/66694/12868/66445/67003/66218/66046/19017/26416/66043/70316/11949/66377/66945/66052/56717/12895/66108/225887/68198/11946/67273/67680/12865/22273/7833…
mmu00270	mmu00270	Cysteine and methionine metabolism	40	-0.395686	-1.90424	9.990216e-04	5.544570e-03	3.452759e-03	528	tags=35%, list=12%, signal=31%	12116/232087/20603/107869/246221/269378/12035/12036/14854/268782/17449/14711/74340/12411
mmu00250	mmu00250	Alanine, aspartate and glutamate metabolism	29	-0.443216	-1.95182	1.555252e-03	7.967673e-03	4.961693e-03	628	tags=41%, list=14%, signal=36%	76282/14415/70503/109900/11484/268782/214579/11565/52633/268860/11898/212647
mmu01230	mmu01230	Biosynthesis of amino acids	65	-0.359114	-1.95212	2.103090e-04	1.321375e-03	8.228574e-04	628	tags=35%, list=14%, signal=31%	76282/66194/21991/170718/217214/232087/110639/56012/107869/109900/11429/12035/12036/18563/18642/15929/11676/109652/269951/108037/18478/11898/12411
mmu03320	mmu03320	PPAR signaling pathway	69	-0.358861	-1.9708	8.216119e-05	6.432905e-04	4.005950e-04	1177	tags=49%, list=26%, signal=37%	20182/20411/66113/12894/19015/11806/11814/14079/12491/11832/74147/11430/26459/14626/13124/20181/22190/22259/109264/20249/104086/11364/12895/208715/113868/93732/20280/16956/14077/11807/26458/17436/80911/56473
mmu00040	mmu00040	Pentose and glucuronate interconversions	27	-0.458784	-1.99301	1.219533e-03	6.550072e-03	4.078913e-03	391	tags=37%, list=9%, signal=34%	72094/394432/112417/58810/100559/67880/71755/394435/20322/102448
mmu00330	mmu00330	Arginine and proline metabolism	42	-0.409848	-1.99917	3.219242e-04	1.914299e-03	1.192088e-03	608	tags=40%, list=14%, signal=35%	66194/56189/75986/20603/11671/69215/12709/14431/18263/11669/13142/66988/338403/56752/110695/67092/212647
mmu00531	mmu00531	Glycosaminoglycan degradation	19	-0.51554	-2.00101	2.326136e-03	1.075838e-02	6.699544e-03	981	tags=53%, list=22%, signal=41%	27029/15586/27419/109685/77042/15931/11881/12091/15212/50917
mmu01240	mmu01240	Biosynthesis of cofactors	115	-0.340644	-2.06017	8.823062e-07	1.632266e-05	1.016458e-05	719	tags=35%, list=16%, signal=30%	22275/319945/13382/67417/66454/11656/67375/20751/232087/72094/17025/11671/77697/13361/394432/14287/112417/12892/98256/12035/12036/58810/14854/78914/100559/11565/226139/15445/75735/11669/22276/108156/11639/71743/56248/71562/394435/108037/107766/209176
mmu00511	mmu00511	Other glycan degradation	16	-0.568146	-2.07567	1.897108e-03	9.571774e-03	5.960611e-03	249	tags=38%, list=6%, signal=36%	66848/18010/12091/15212/71665/23956
mmu00561	mmu00561	Glycerolipid metabolism	41	-0.450539	-2.18868	8.594340e-05	6.504353e-04	4.050443e-04	616	tags=46%, list=14%, signal=40%	55979/14626/16891/110524/104418/217480/227333/11671/18946/58810/16956/67800/320127/110197/11669/28169/56752/110695/235582
mmu00450	mmu00450	Selenocompound metabolism	13	-0.64774	-2.22225	6.166670e-04	3.602633e-03	2.243461e-03	622	tags=54%, list=14%, signal=47%	50880/211006/107869/23971/23972/20768/21743
mmu00053	mmu00053	Ascorbate and aldarate metabolism	24	-0.535808	-2.23056	1.474147e-04	1.022689e-03	6.368573e-04	391	tags=46%, list=9%, signal=42%	72094/11671/394432/112417/58810/100559/11669/56752/56727/110695/394435
mmu00340	mmu00340	Histidine metabolism	18	-0.611191	-2.32968	1.204774e-04	8.721518e-04	5.431133e-04	380	tags=56%, list=8%, signal=51%	140483/11671/11484/71761/11669/338403/56752/110695/243537/14317
mmu01200	mmu01200	Carbon metabolism	98	-0.399834	-2.33641	6.217323e-08	1.725307e-06	1.074397e-06	628	tags=41%, list=14%, signal=36%	76282/68738/56451/73724/21991/170718/11532/20916/109264/93747/110639/56012/20917/110821/66945/66052/78920/68263/11429/67680/110446/56185/434437/18563/12359/104776/18642/18293/15929/17449/11676/66904/269951/11409/17436/108037/80911/235582/14121/60525
mmu00785	mmu00785	Lipoic acid metabolism	13	-0.681681	-2.33869	2.648935e-04	1.603809e-03	9.987371e-04	916	tags=85%, list=20%, signal=68%	18597/235339/13382/13171/117147/78920/68263/434437/12040/18293/12039
mmu00670	mmu00670	One carbon pool by folate	32	-0.521677	-2.37238	1.246411e-05	1.297046e-04	8.077069e-05	574	tags=56%, list=13%, signal=49%	13382/218865/12116/232087/107747/107869/13361/269378/434437/14711/74129/108156/74340/110695/108037/192166/12411/14317
mmu00071	mmu00071	Fatty acid degradation	39	-0.51226	-2.46404	3.704994e-06	4.569492e-05	2.845551e-05	645	tags=49%, list=14%, signal=42%	231086/11529/11532/93747/11364/11522/12895/11671/71519/66885/113868/110446/15107/11669/270076/56752/11409/110695/80911
mmu00620	mmu00620	Pyruvate metabolism	41	-0.531982	-2.58433	1.239109e-06	2.063117e-05	1.284761e-05	1020	tags=66%, list=23%, signal=51%	17448/14651/74156/18597/235339/66204/13382/68738/11529/11532/109264/100705/11522/11671/75572/68263/110446/58810/18563/52815/17449/11669/76238/56752/110695/17436/60525
mmu00380	mmu00380	Tryptophan metabolism	37	-0.548703	-2.60143	7.422250e-07	1.566849e-05	9.757205e-06	477	tags=49%, list=11%, signal=44%	93747/266645/13076/78920/11671/98256/110446/12359/15107/23923/11669/270076/21743/56752/110695/71562/107766/209176
mmu00770	mmu00770	Pantothenate and CoA biosynthesis	19	-0.678865	-2.63494	7.700074e-06	8.547082e-05	5.322507e-05	378	tags=53%, list=8%, signal=48%	209558/11671/12035/12036/75735/11669/103149/64705/71743/246277
mmu00260	mmu00260	Glycine, serine and threonine metabolism	36	-0.563067	-2.64304	6.413664e-07	1.525536e-05	9.499939e-06	686	tags=61%, list=15%, signal=52%	13382/11656/218865/12116/56012/107869/26912/14431/434437/268782/14711/19193/76238/74129/13142/27364/110695/108037/67092/235582/192166/12411
mmu00410	mmu00410	beta-Alanine metabolism	26	-0.623111	-2.66837	1.341490e-06	2.127220e-05	1.324679e-05	931	tags=77%, list=21%, signal=61%	74147/227095/11430/14417/99586/14415/93747/11671/56690/104776/11669/103149/64705/338403/56752/11409/110695/80911/268860/246277
mmu00630	mmu00630	Glyoxylate and dicarboxylate metabolism	27	-0.617015	-2.68039	8.483168e-07	1.632266e-05	1.016458e-05	686	tags=63%, list=15%, signal=54%	13382/68738/73724/110821/11429/110446/56185/434437/12359/68180/17449/66904/76238/71562/108037/235582/60525
mmu00020	mmu00020	Citrate cycle (TCA cycle)	29	-0.617425	-2.71899	5.151482e-07	1.319572e-05	8.217344e-06	916	tags=76%, list=20%, signal=61%	66925/239017/17448/18597/235339/11428/13382/56451/170718/20916/20917/66945/66052/78920/68263/11429/67680/18563/18293/15929/17449/269951
mmu01210	mmu01210	2-Oxocarboxylic acid metabolism	29	-0.685406	-3.01837	4.098352e-09	1.516390e-07	9.442985e-08	916	tags=72%, list=20%, signal=58%	18597/235339/11428/13382/76282/13171/170718/217214/78920/68263/11429/12035/12036/268782/12040/18293/15929/12039/23923/109652/269951
mmu00650	mmu00650	Butanoate metabolism	24	-0.73506	-3.06005	6.835527e-09	2.276231e-07	1.417473e-07	549	tags=71%, list=12%, signal=63%	14415/93747/117147/217666/208715/110446/67041/20216/214579/15107/15356/233799/272428/71911/11409/268860/78894
mmu00190	mmu00190	Oxidative phosphorylation	114	-0.511919	-3.0975	8.104096e-17	1.349332e-14	8.402668e-15	1156	tags=65%, list=26%, signal=49%	69875/66925/110323/28080/11966/73834/68197/12861/12867/12859/68375/595136/57423/72900/228033/12858/66576/27425/11973/13063/407785/11951/75406/66594/68342/11957/67130/21871/11964/12857/67126/11984/66142/22272/68349/54405/12864/12866/11958/76252/226646/71679/17992/227197/68194/66694/12868/66445/67003/66218/66046/66043/70316/11949/66377/66945/66052/66108/225887/68198/11946/67273/67680/110935/12865/7…
mmu00640	mmu00640	Propanoate metabolism	28	-0.758399	-3.32056	1.476344e-11	7.023179e-10	4.373530e-10	931	tags=82%, list=21%, signal=66%	74147/227095/11430/380660/13382/13171/68738/56451/73724/20916/93747/100705/20917/110821/56690/104776/12040/12039/66904/11409/80911/268860/60525
mmu04146	mmu04146	Peroxisome	78	-0.587723	-3.33023	5.099906e-16	4.245671e-14	2.643898e-14	620	tags=53%, list=14%, signal=46%	56535/19298/19302/70503/74114/19300/14712/67993/224824/71382/18634/51798/76263/67420/113868/93732/20280/69129/16922/56185/12359/110959/668173/19301/56690/12908/28200/228061/15356/19305/19193/20655/111175/13142/26458/93734/13850/269951/80911/17117/20656
mmu00280	mmu00280	Valine, leucine and isoleucine degradation	44	-0.738361	-3.6566	3.126371e-16	3.470272e-14	2.161036e-14	686	tags=77%, list=15%, signal=66%	13382/231086/13171/73724/93747/11364/110821/11671/66885/208715/113868/110446/67041/12035/12036/66948/268782/104776/12040/72039/11992/12039/15107/15356/66904/11669/58875/56752/11409/78038/110695/268860/78894/56357
